# Supplementary material for: Ladder-like heteropolynuclear assemblies via cyanido bridges and platinum(ii)–thallium(i) bonds: structural and photophysical properties
Source: Royal Society of Chemistry journal article supplement (doi:10.1039/d4dt00674g), 2024-01-01
Supplement: d4dt00674g1.pdf [file d4dt00674g1.pdf]

# Ladder-Like Heteropolynuclear Assemblies via Cyanido Bridges and Platinum(II)-Thallium(I) Bonds: Structural and Photophysical Properties

Mina Sadeghian,<sup>a,b</sup> David Gómez de Segura,<sup>b</sup> Mohsen Golbon Haghghi,<sup>\*,a</sup> Nasser Safari,<sup>a</sup> Elena Lalinde<sup>\*,b</sup> and M. Teresa Moreno<sup>\*,b</sup>

<sup>a</sup> Department of Chemistry, Shahid Beheshti University, Evin, Tehran 19839-69411, Iran.

E-mail: [m\\_golbon@sbu.ac.ir](mailto:m_golbon@sbu.ac.ir)

<sup>b</sup> Departamento de Química, Instituto de Investigación en Química (IQUR), Complejo Científico Tecnológico, Universidad de La Rioja, 26006 Logroño, Spain. E-mail:

[elena.lalinde@unirioja.es](mailto:elena.lalinde@unirioja.es); [teresa.moreno@unirioja.es](mailto:teresa.moreno@unirioja.es)

|                                                                 |     |
|-----------------------------------------------------------------|-----|
| <b>1.- NMR Spectra</b>                                          | S2  |
| <b>2.- Crystal Structures</b>                                   | S8  |
| <b>3. Photophysical Properties and Theoretical Calculations</b> | S12 |

## 1.- NMR Spectra

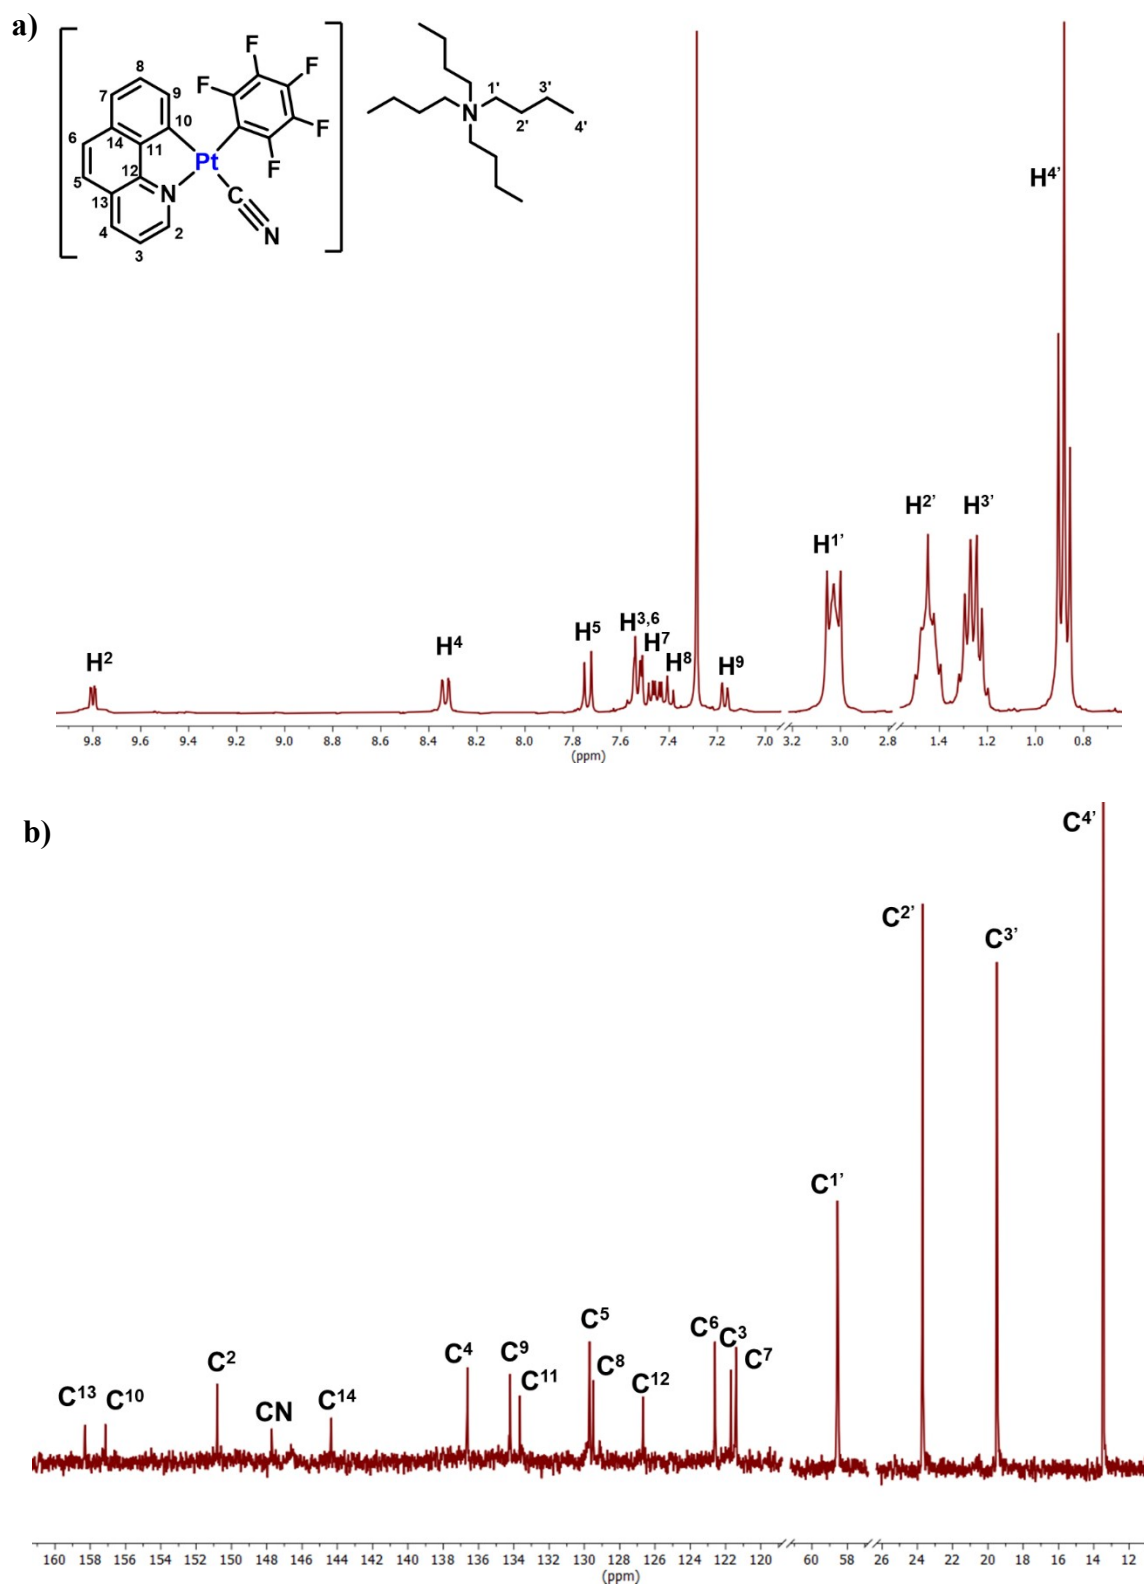

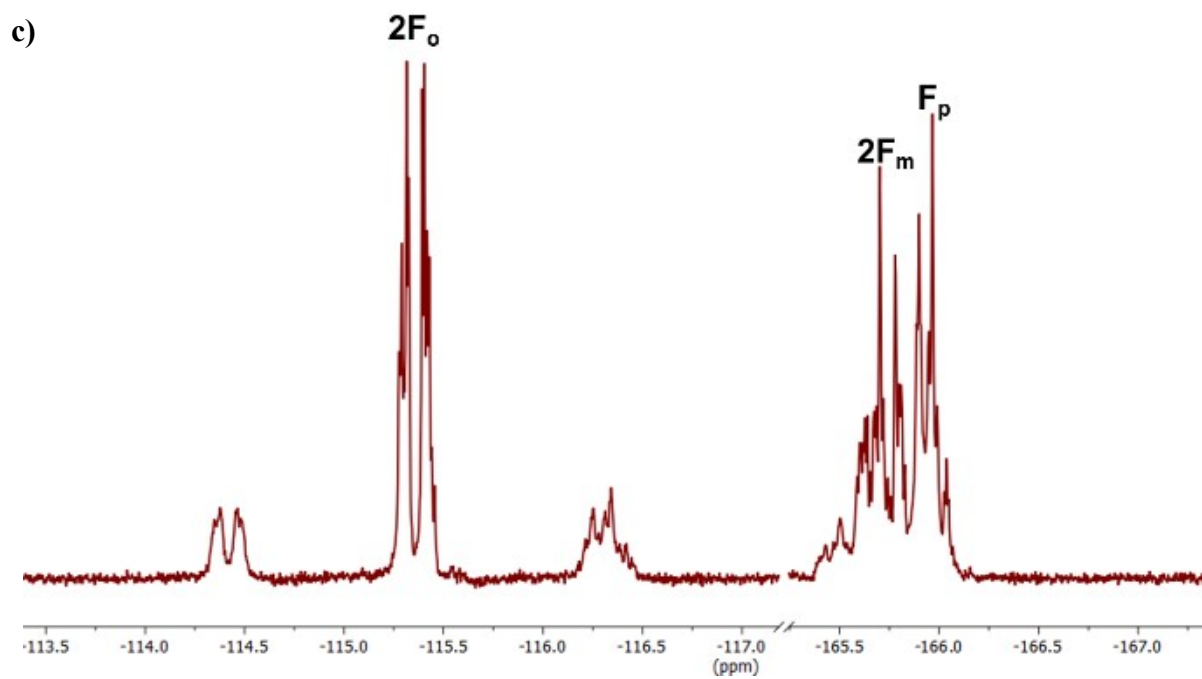

**Figure S1.** NMR spectra of **1** in  $\text{CDCl}_3$  at 298 K, a)  $^1\text{H}$ , b)  $^{13}\text{C}\{^1\text{H}\}$ , c)  $^{19}\text{F}\{^1\text{H}\}$ .

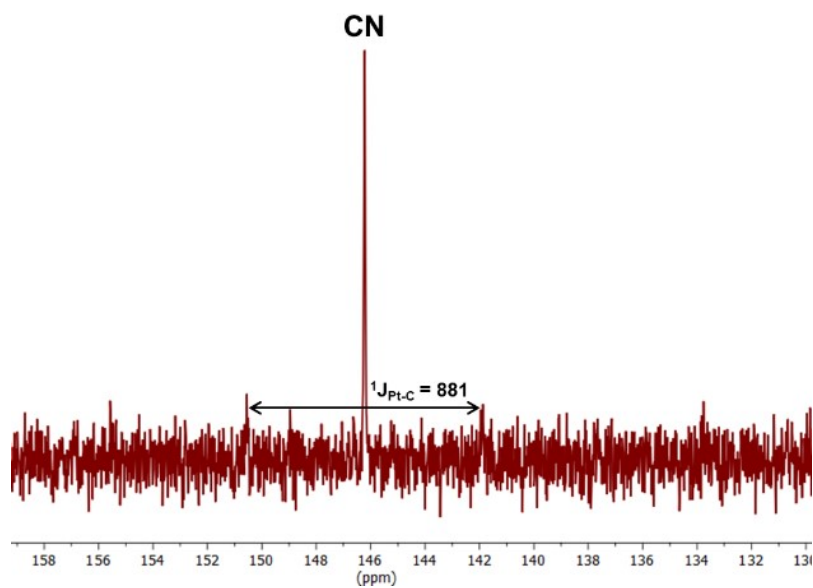

**Figure S2.** Selected region of the  $^{13}\text{C}\{^1\text{H}\}$  NMR spectra of  $\text{K}[\{\text{Pt}(\text{bzq})(\text{C}_6\text{F}_5)(^{13}\text{CN})\}\text{TI}]$  (**1'**) in  $\text{CDCl}_3$ .

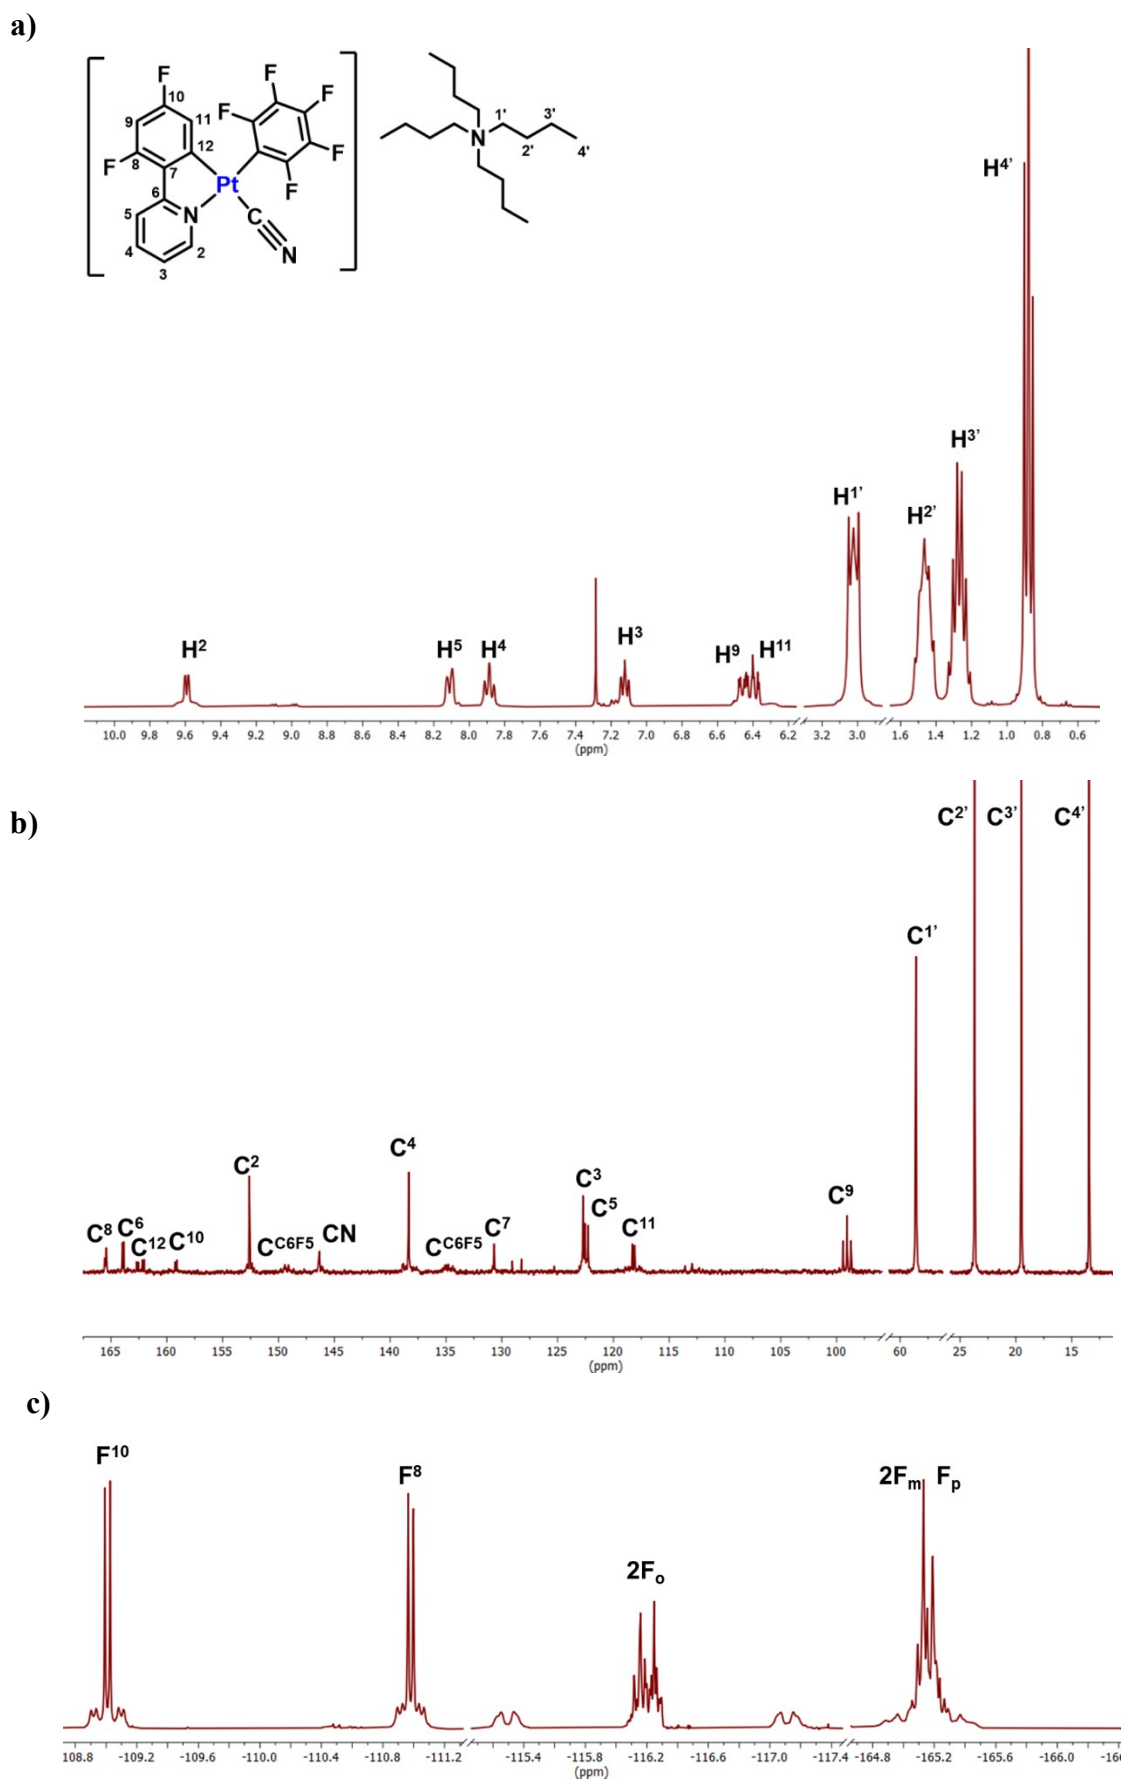

**Figure S3.** NMR spectra of **2** in  $\text{CDCl}_3$  at 298 K, a)  $^1\text{H}$ , b)  $^{13}\text{C}\{^1\text{H}\}$ , c)  $^{19}\text{F}\{^1\text{H}\}$ .

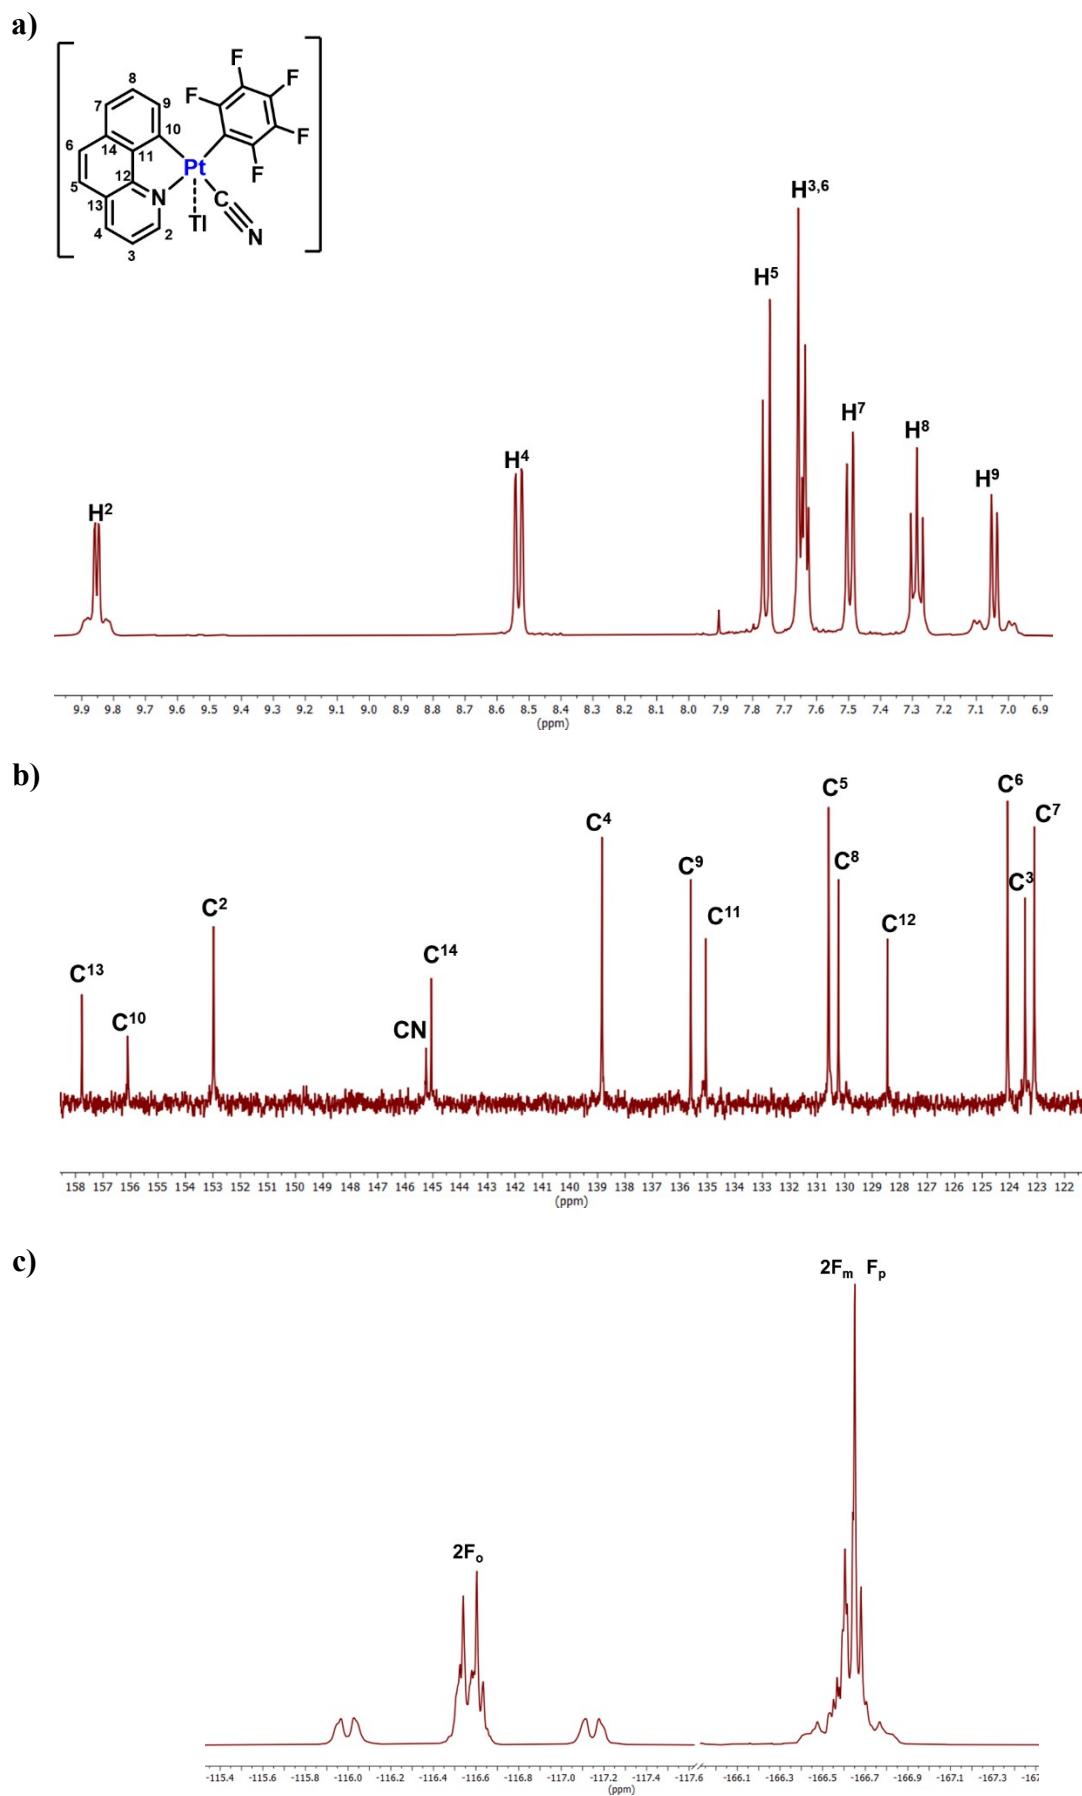

**Figure S4.** NMR spectra of **3** in THF- $d_8$  at 298 K, a)  $^1\text{H}$ , b)  $^{13}\text{C}\{^1\text{H}\}$ , c)  $^{19}\text{F}\{^1\text{H}\}$ .

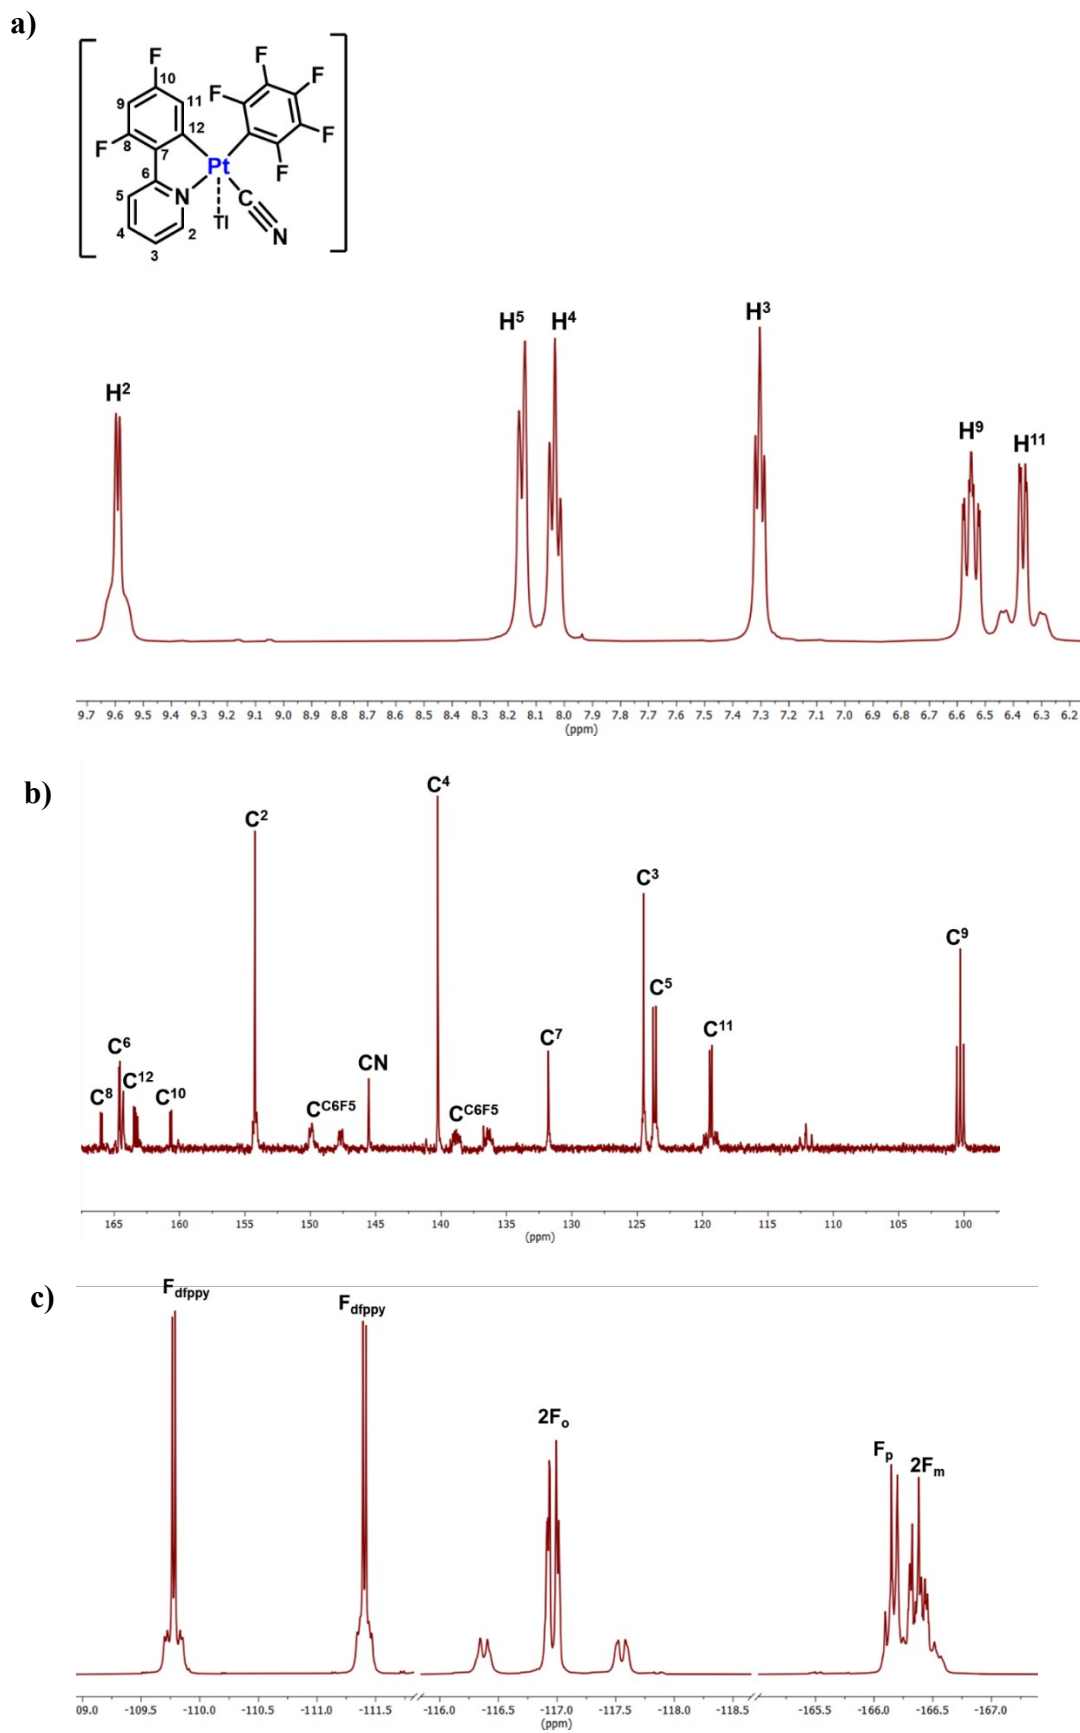

**Figure S5.** NMR spectra of **4** in THF- $d_8$  at 298 K, a)  $^1\text{H}$ , b)  $^{13}\text{C}\{^1\text{H}\}$ , c)  $^{19}\text{F}\{^1\text{H}\}$ .

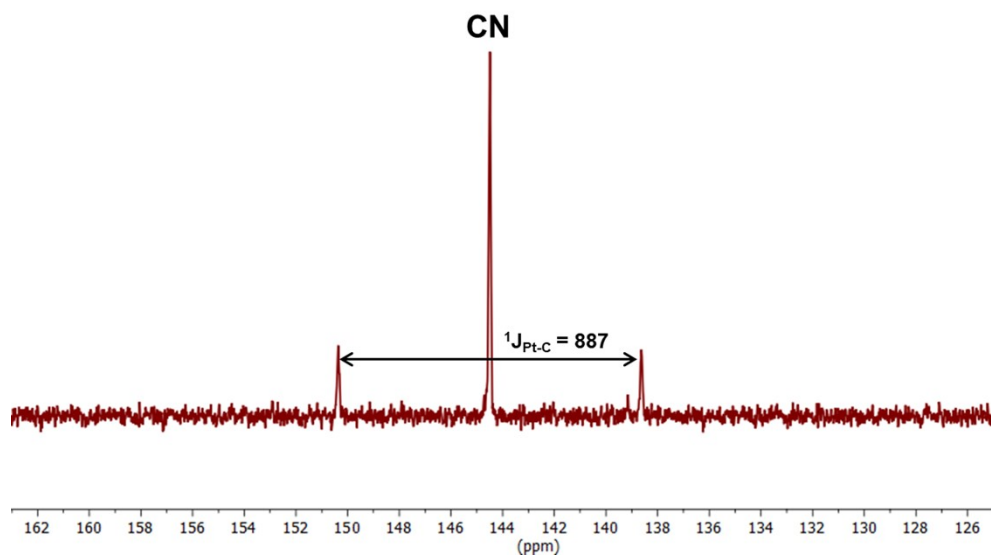

**Figure S6.** Selected region of the  $^{13}\text{C}\{^1\text{H}\}$  NMR spectra of [ $\{\text{Pt}(\text{dfppy})(\text{C}_6\text{F}_5)(^{13}\text{CN})\}\text{Ti}$ ] (**4'**) in THF- $d_8$

## 2.- Crystal Structures

**Table S1.** Crystal Data and Structure Refinement of  $\{[\text{Pt}(\text{bzq})(\text{C}_6\text{F}_5)(\text{CN})\text{TI}]\cdot\text{THF}\}_n$  (**3**·THF)<sub>n</sub> and  $[\{\text{Pt}(\text{dfppy})(\text{C}_6\text{F}_5)(\text{CN})\}\text{TI}]_4\cdot\text{C}_4\text{H}_8\text{O}_2$  [**4**]<sub>4</sub>·C<sub>4</sub>H<sub>8</sub>O<sub>2</sub>

|                                                                    | ( <b>3</b> ·THF) <sub>n</sub>                                      | [ <b>4</b> ] <sub>4</sub> ·C <sub>4</sub> H <sub>8</sub> O <sub>2</sub>                                    |
|--------------------------------------------------------------------|--------------------------------------------------------------------|------------------------------------------------------------------------------------------------------------|
| Empirical formula                                                  | <b>C<sub>24</sub>H<sub>16</sub>F<sub>5</sub>N<sub>2</sub>OPtTI</b> | <b>C<sub>76</sub>H<sub>32</sub>F<sub>28</sub>N<sub>8</sub>O<sub>1.22</sub>Pt<sub>4</sub>TI<sub>4</sub></b> |
| Molecular weight                                                   | 842.85                                                             | 3206.45                                                                                                    |
| T (K)                                                              | 293(2) K                                                           | 100(2)                                                                                                     |
| λ (Å)                                                              | 0.71073                                                            | 0.71076                                                                                                    |
| Crystal system                                                     | Triclinic                                                          | Triclinic                                                                                                  |
| Space group                                                        | P -1                                                               | P -1                                                                                                       |
| Crystal size (mm)                                                  | 0.241 × 0.058 × 0.034                                              | 0.275 × 0.067 × 0.050                                                                                      |
| a (Å)                                                              | 11.887(2)                                                          | 12.0740(8)                                                                                                 |
| b (Å)                                                              | 13.521(3)                                                          | 12.6188(9)                                                                                                 |
| c (Å)                                                              | 14.790(3)                                                          | 12.9418(9)                                                                                                 |
| α (°)                                                              | 74.76(3)                                                           | 101.227(2)                                                                                                 |
| β (°)                                                              | 88.11(3)                                                           | 101.332(3)                                                                                                 |
| γ (°)                                                              | 76.40(3)                                                           | 98.078(3)                                                                                                  |
| V (Å <sup>3</sup> )                                                | 2228.1(9)                                                          | 1863.3(2)                                                                                                  |
| Z                                                                  | 4                                                                  | 1                                                                                                          |
| ρ (calculated)<br>(Mg/m <sup>3</sup> )                             | 2.513                                                              | 2.858                                                                                                      |
| μ (mm <sup>-1</sup> )                                              | 13.557                                                             | 16.215                                                                                                     |
| F (000)                                                            | 1544                                                               | 1442                                                                                                       |
| θ range for data<br>collection (°)                                 | 2.235 to 27.927                                                    | 2.606 to 26.373                                                                                            |
| Index ranges                                                       | -15 ≤ h ≤ 15,<br>-17 ≤ k ≤ 17,<br>-19 ≤ l ≤ 19                     | -15 ≤ h ≤ 15,<br>-15 ≤ k ≤ 15,<br>-16 ≤ l ≤ 16                                                             |
| Reflections collected                                              | 126056                                                             | 99409                                                                                                      |
| Independent reflections                                            | 10673 [R(int) = 0.0341]                                            | 7619 [R(int) = 0.0517]                                                                                     |
| Data / restraints /<br>parameters                                  | 10673 / 0 / 613                                                    | 7619 / 0 / 550                                                                                             |
| Goodness-of-fit on F <sup>2</sup> [a]                              | 1.057                                                              | 1.151                                                                                                      |
| Final R indices<br>[I > 2σ(I)] [a]                                 | R1 = 0.0150, wR2 =<br>0.0296                                       | R1 = 0.0205, wR2 = 0.0461                                                                                  |
| R indices (all data) [a]                                           | R1 = 0.0193, wR2 =<br>0.0311                                       | R1 = 0.0227, wR2 = 0.0469                                                                                  |
| Largest diff. peak<br>and hole (e Å <sup>-3</sup> )<br>(dmin/dmax) | 1.445 and -0.956                                                   | 2.179 and -1.138                                                                                           |

[a]  $R1 = \sum (|F_o| - |F_c|) / \sum |F_o|$ ;  $wR2 = [\sum w (F_o^2 - F_c^2)^2 / \sum w F_o^2]^{1/2}$ ; goodness of fit =  $\{\sum [w (F_o^2 - F_c^2)^2] / (N_{\text{obs}} - N_{\text{param}})\}^{1/2}$ ;  $w = [\sigma^2 (F_o) + (g1P)^2 + g2P]^{-1}$ ;  $P = [\max(F_o^2; 0 + 2F_c^2)]/3$ .



**Table S2.** Selected bond lengths (Å) and angles (°) of  $\{[\text{Pt}(\text{bzq})(\text{C}_6\text{F}_5)(\text{CN})\text{Tl}]\cdot\text{THF}\}_n$  ( $3\cdot\text{THF}$ )<sub>n</sub> and  $[\{\text{Pt}(\text{dfppy})(\text{C}_6\text{F}_5)(\text{CN})\}\text{Tl}]_4\cdot\text{C}_4\text{H}_8\text{O}_2$  [ $4$ ]<sub>4</sub>·C<sub>4</sub>H<sub>8</sub>O<sub>2</sub>

| <b>(3·THF)<sub>n</sub></b>                                     |           |                       |            |
|----------------------------------------------------------------|-----------|-----------------------|------------|
| <b>Distances (Å)</b>                                           |           | <b>Angles (°)</b>     |            |
| Pt(1)-C(1)                                                     | 2.051(3)  | C(1)-Pt(1)-N(1)       | 80.80(10)  |
| Pt(1)-N(1)                                                     | 2.097(2)  | C(15)-Pt(1)-C(1)      | 93.78(11)  |
| Pt(1)-C(15)                                                    | 2.030(3)  | C(14)-Pt(1)-C(1)      | 172.49(10) |
| Pt(1)-C(14)                                                    | 2.024(3)  | C(14)-Pt(1)-C(15)     | 91.75(11)  |
| Pt(1)-Tl(1)                                                    | 3.0279(7) | C(14)-Pt(1)-N(1)      | 93.71(10)  |
| Pt(1)-Tl(2)                                                    | 3.0402(7) | C(15)-Pt(1)-N(1)      | 174.54(9)  |
| Tl(2)-O(1)                                                     | 2.667(2)  | C(14)-Pt(1)-Tl(1)     | 91.83(8)   |
| Tl(2)-N(2)                                                     | 2.723(2)  | C(15)-Pt(1)-Tl(1)     | 104.64(8)  |
| Tl(2)-Pt(2)                                                    | 3.0140(7) | C(1)-Pt(1)-Tl(1)      | 81.85(8)   |
| Pt(2)-C(35)                                                    | 2.024(3)  | N(1)-Pt(1)-Tl(1)      | 75.41(7)   |
| Pt(2)-C(34)                                                    | 2.027(3)  | C(14)-Pt(1)-Tl(2)     | 91.87(8)   |
| Pt(2)-C(21)                                                    | 2.052(3)  | C(15)-Pt(1)-Tl(2)     | 98.03(8)   |
| Pt(2)-N(3)                                                     | 2.097(2)  | C(1)-Pt(1)-Tl(2)      | 92.39(8)   |
| Pt(2)-Tl(1)#1                                                  | 2.9795(6) | N(1)-Pt(1)-Tl(2)      | 81.60(6)   |
| Tl(1)-N(4)                                                     | 2.669(3)  | Tl(1)-Pt(1)-Tl(2)     | 156.900(9) |
|                                                                |           | O(1)-Tl(2)-N(2)       | 99.56(7)   |
|                                                                |           | O(1)-Tl(2)-Pt(2)      | 102.43(6)  |
|                                                                |           | N(2)-Tl(2)-Pt(2)      | 93.90(6)   |
|                                                                |           | O(1)-Tl(2)-Pt(1)      | 95.76(6)   |
|                                                                |           | N(2)-Tl(2)-Pt(1)      | 97.27(6)   |
|                                                                |           | Pt(2)-Tl(2)-Pt(1)     | 156.739(9) |
|                                                                |           | C(35)-Pt(2)-C(34)     | 89.84(11)  |
|                                                                |           | C(35)-Pt(2)-C(21)     | 94.15(11)  |
|                                                                |           | C(34)-Pt(2)-C(21)     | 174.93(10) |
|                                                                |           | C(35)-Pt(2)-N(3)      | 174.45(9)  |
|                                                                |           | C(34)-Pt(2)-N(3)      | 94.83(10)  |
|                                                                |           | C(21)-Pt(2)-N(3)      | 81.03(10)  |
|                                                                |           | C(35)-Pt(2)-Tl(1)#1   | 94.19(8)   |
|                                                                |           | C(34)-Pt(2)-Tl(1)#1   | 93.85(8)   |
|                                                                |           | C(21)-Pt(2)-Tl(1)#1   | 82.76(8)   |
|                                                                |           | N(3)-Pt(2)-Tl(1)#1    | 82.54(6)   |
|                                                                |           | C(35)-Pt(2)-Tl(2)     | 98.67(8)   |
|                                                                |           | C(34)-Pt(2)-Tl(2)     | 89.15(8)   |
|                                                                |           | C(21)-Pt(2)-Tl(2)     | 93.33(8)   |
|                                                                |           | N(3)-Pt(2)-Tl(2)      | 84.41(6)   |
| <b>[4]<sub>4</sub>·C<sub>4</sub>H<sub>8</sub>O<sub>2</sub></b> |           |                       |            |
| <b>Distances (Å)</b>                                           |           | <b>Angles (°)</b>     |            |
| Pt(1)-C(1)#1                                                   | 2.039(4)  | C(1)#1-Pt(1)-N(1)#1   | 80.12(17)  |
| Pt(1)-N(1)#1                                                   | 2.082(4)  | C(13)#1-Pt(1)-Tl(2)   | 99.42(12)  |
| Pt(1)-C(12)#1                                                  | 2.021(5)  | C(12)#1-Pt(1)-Tl(2)   | 85.68(12)  |
| Pt(1)-C(13)#1                                                  | 2.016(4)  | C(1)#1-Pt(1)-Tl(2)    | 95.98(11)  |
| Pt(1)-Tl(2)                                                    | 3.0518(3) | N(1)#1-Pt(1)-Tl(2)    | 80.65(10)  |
| Pt(1)-Tl(1)#1                                                  | 3.0736(3) | C(13)#1-Pt(1)-Tl(1)#1 | 97.85(12)  |
| Tl(2)-N(2)                                                     | 2.626(4)  | C(12)#1-Pt(1)-Tl(1)#1 | 95.24(12)  |
| Tl(1)-N(4)                                                     | 2.596(4)  | C(1)#1-Pt(1)-Tl(1)#1  | 82.33(11)  |
| Pt(2)-C(31)                                                    | 2.014(4)  | N(1)#1-Pt(1)-Tl(1)#1  | 82.13(10)  |
| Pt(2)-C(30)                                                    | 2.007(4)  | Tl(2)-Pt(1)-Tl(1)#1   | 162.723(8) |
| Pt(2)-C(19)                                                    | 2.025(4)  | C(13)#1-Pt(1)-C(12)#1 | 88.74(17)  |
| Pt(2)-N(3)                                                     | 2.075(4)  | C(13)#1-Pt(1)-C(1)#1  | 93.80(18)  |
| Pt(2)-Tl(2)                                                    | 2.9258(3) | C(12)#1-Pt(1)-C(1)#1  | 176.69(17) |

|  |                      |            |
|--|----------------------|------------|
|  | C(13)#1-Pt(1)-N(1)#1 | 173.88(16) |
|  | C(12)#1-Pt(1)-N(1)#1 | 97.36(16)  |
|  | C(30)-Pt(2)-C(31)    | 88.76(17)  |
|  | C(30)-Pt(2)-C(19)    | 176.13(17) |
|  | C(31)-Pt(2)-C(19)    | 94.46(17)  |
|  | C(30)-Pt(2)-N(3)     | 96.41(16)  |
|  | C(31)-Pt(2)-N(3)     | 174.50(15) |
|  | C(19)-Pt(2)-N(3)     | 80.31(16)  |
|  | C(30)-Pt(2)-Tl(2)    | 97.04(12)  |
|  | C(31)-Pt(2)-Tl(2)    | 93.70(12)  |
|  | C(19)-Pt(2)-Tl(2)    | 84.93(11)  |
|  | N(3)-Pt(2)-Tl(2)     | 87.57(10)  |
|  | N(2)-Tl(2)-Pt(2)     | 91.43(9)   |
|  | N(2)-Tl(2)-Pt(1)     | 97.96(9)   |
|  | Pt(2)-Tl(2)-Pt(1)    | 160.299(8) |
|  | N(4)-Tl(1)-Pt(1)#1   | 89.06(9)   |

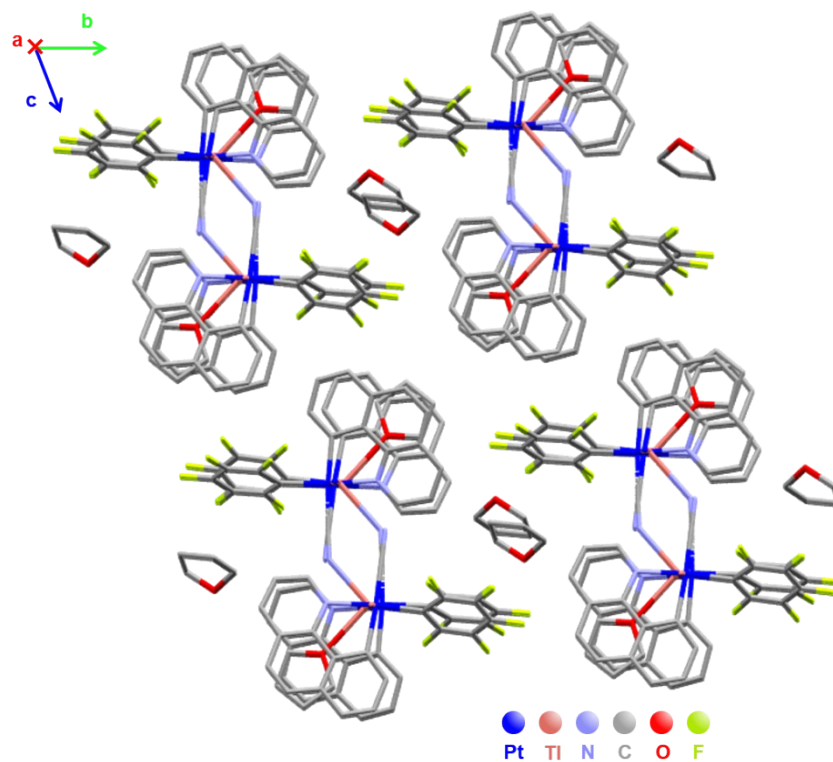

**Figure S7.** Packing of the crystal structure of  $(\mathbf{3} \cdot \text{THF})_n$ .

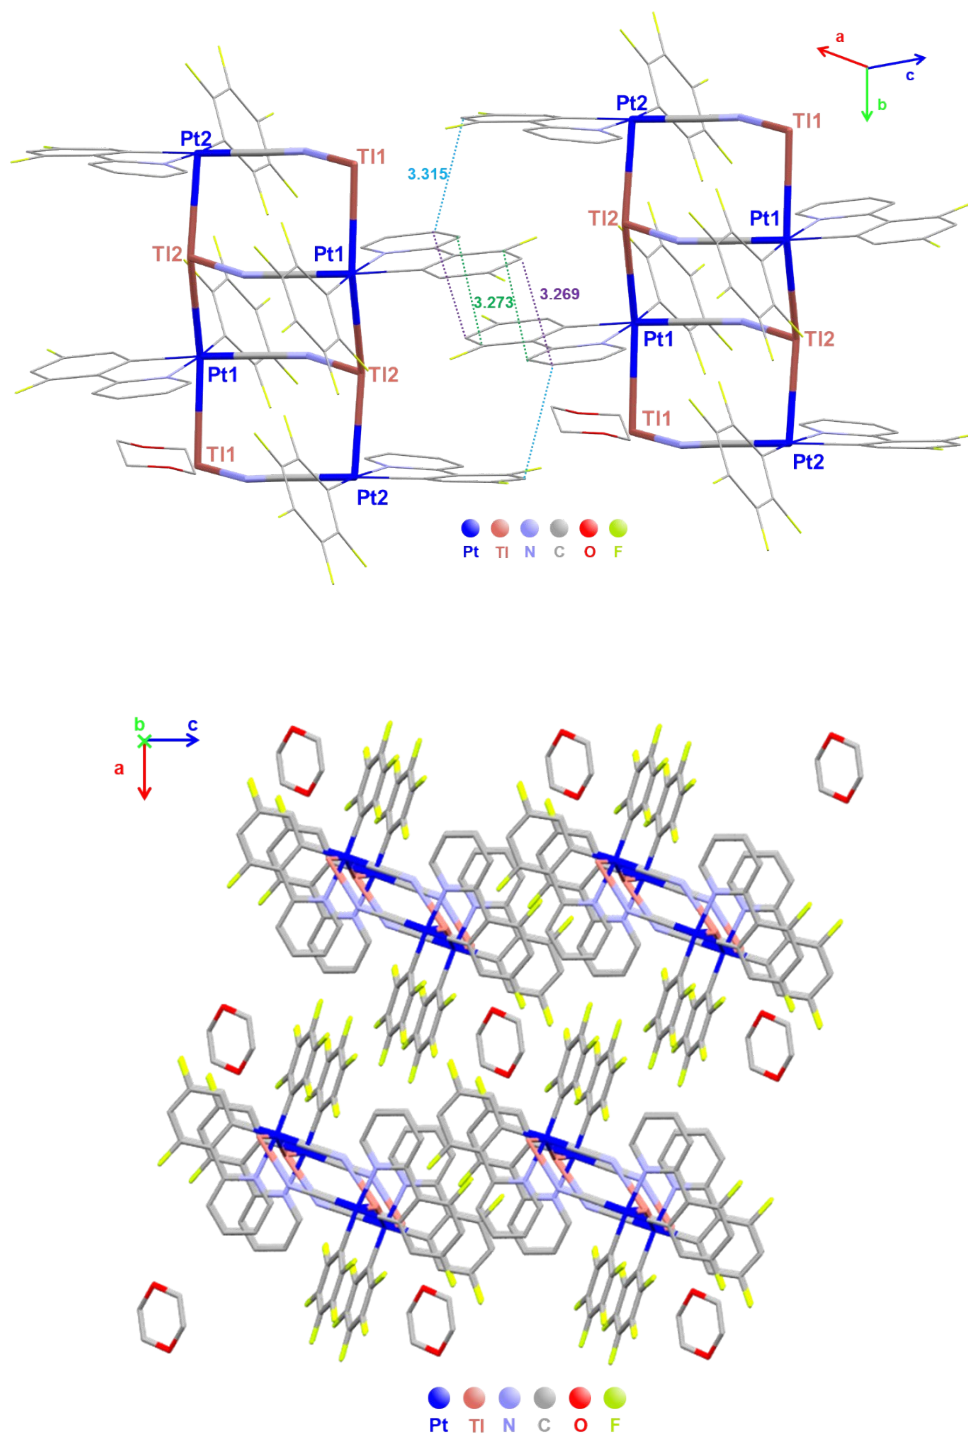

**Figure S8.** Two different views of the packing of the crystal structure of  $[4]_4 \cdot C_4H_8O_2$ .

### 3. Photophysical Properties and Theoretical Calculations

**Table S3.** Absorption data for complexes **1–4** in THF ( $5 \times 10^{-5}$  M) and solid state at 298 K

| Compound                              | Media        | $\lambda_{\text{abs}}/\text{nm}$ ( $\epsilon \times 10^{-3} \text{ M}^{-1} \text{ cm}^{-1}$ ) |
|---------------------------------------|--------------|-----------------------------------------------------------------------------------------------|
| <b>1</b>                              | <b>THF</b>   | 221(35.7), 254(34.9), 309(10.0), 341(7.0), 351(5.4), 378(3.4), 430(1.5), with tail to 450     |
|                                       | <b>Solid</b> | 286, 309, 328, 347, 375, 393, 415, 427, 461 <sub>sh</sub> , with tail to 500                  |
| <b>2</b>                              | <b>THF</b>   | 219(25.2), 256(29.6), 319(7.2), 353(4.6), 382(2.5), with tail to 415                          |
|                                       | <b>Solid</b> | 284, 312, 322, 350, 372, 390, 426 <sub>sh</sub> , 456, 464, 471, with tail to 475             |
| <b>3</b>                              | <b>THF</b>   | 222(34.0), 235(31.0), 248(32.0), 303(11.5), 340(6.2), 371(2.7), 420(1.4), with tail to 440    |
|                                       | <b>Solid</b> | 296, 310, 370, 422, 437, 492, 519, with tail to 575                                           |
| <b>3-MeOH</b>                         | <b>Solid</b> | 295, 311, 334, 358, 375, 399, 420, 431, 465, 499, with tail to 575                            |
| <b>3-CH<sub>2</sub>Cl<sub>2</sub></b> | <b>Solid</b> | 287, 308, 338, 364, 391, 416, 468, 492, 527, 555, with tail to 620                            |
| <b>3-THF</b>                          | <b>Solid</b> | 306, 325, 350, 360, 370, 375, 397, 411, 445, 475, 495, 514, 528, 580, with tail to 675        |
| <b>3-Et<sub>2</sub>O</b>              | <b>Solid</b> | 294, 310, 330, 342, 357, 394, 421, 447, 474, 505, with tail to 575                            |
| <b>3-ground</b>                       | <b>Solid</b> | 290, 310, 328, 346, 379, 398, 415, 467, 496, 516, 560, with tail to 640                       |
| <b>4</b>                              | <b>THF</b>   | 222(24.1), 255(27.0), 318(7.2), 346(4.3), 374(2.3), with tail to 400                          |
|                                       | <b>Solid</b> | 288, 308, 334, 365, 387, 410, 425, 458, with tail to 525                                      |
| <b>4-MeOH</b>                         | <b>Solid</b> | 295, 328, 344, 362, 387, 417, 428, 460, 492, 520, with tail to 573                            |
| <b>4-ground</b>                       | <b>Solid</b> | 280, 290, 308, 320, 359, 376, 388, 465, with tail to 550                                      |

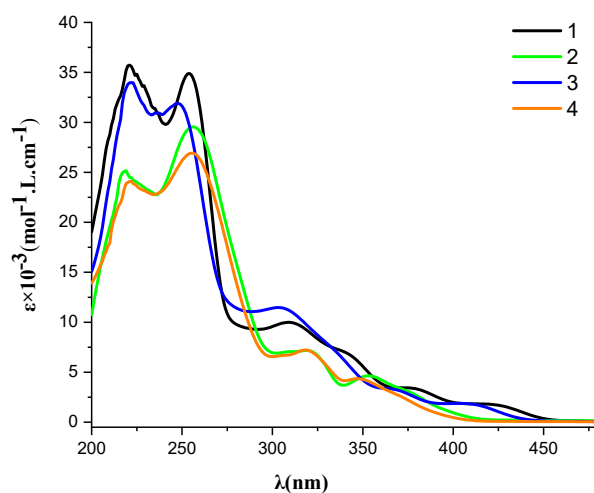

**Figure S9.** UV-Vis absorption spectra of complexes **1-4** in THF  $5 \times 10^{-5}$  M at 298 K.

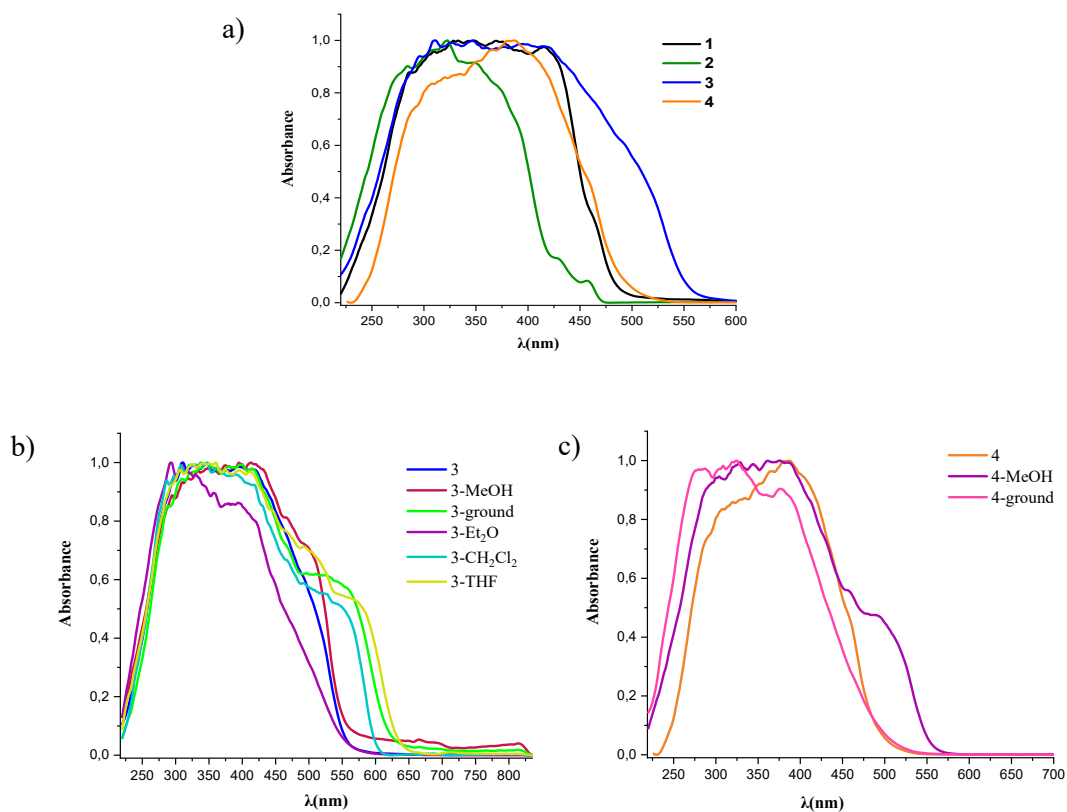

**Figure S10.** Absorption spectra in solid state of the complexes a) **1-4**, b) **3**, c) **4**.

| <b>Table S4. Selected vertical excitation energies singlets (<math>S_n</math>) and first triplets computed by TDDFT (THF) with the orbitals involved for <math>1^-</math> and <math>2^-</math></b> |                                |                       |                                                 |
|----------------------------------------------------------------------------------------------------------------------------------------------------------------------------------------------------|--------------------------------|-----------------------|-------------------------------------------------|
| <b>[Pt(bzq)(C<sub>6</sub>F<sub>5</sub>)(CN)]<sup>-</sup> (<math>1^-</math>)</b>                                                                                                                    |                                |                       |                                                 |
| <b>State</b>                                                                                                                                                                                       | <b><math>\lambda</math>/nm</b> | <b><math>f</math></b> | <b>Transition (% Contribution)</b>              |
| <b>T<sub>1</sub></b>                                                                                                                                                                               | 467.46                         | 0.0                   | H-3→LUMO (27%), HOMO→LUMO (22%), HOMO→L+1 (30%) |
| <b>T<sub>2</sub></b>                                                                                                                                                                               | 443.02                         | 0.0                   | HOMO→LUMO (71%), HOMO→L+1 (16%)                 |
| <b>T<sub>3</sub></b>                                                                                                                                                                               | 389.69                         | 0.0                   | H-3→LUMO (52%), HOMO→L+1 (36%)                  |
| <b>S<sub>1</sub></b>                                                                                                                                                                               | 399.33                         | 0.0436                | HOMO→LUMO (95%)                                 |
| <b>S<sub>2</sub></b>                                                                                                                                                                               | 374.54                         | 0.0028                | H-2→LUMO (21%), H-1→LUMO (78%)                  |
| <b>S<sub>3</sub></b>                                                                                                                                                                               | 352.70                         | 0.0                   | H-2→LUMO (77%), H-1→LUMO (20%)                  |
| <b>S<sub>4</sub></b>                                                                                                                                                                               | 337.60                         | 0.0347                | H-3→LUMO (26%), HOMO→L+1 (67%)                  |
| <b>S<sub>5</sub></b>                                                                                                                                                                               | 317.57                         | 0.2178                | H-3→LUMO (61%), HOMO→L+1 (27%)                  |
| <b>S<sub>6</sub></b>                                                                                                                                                                               | 316.62                         | 0.0056                | H-2→L+1 (17%), H-1→L+1 (81%)                    |
| <b>S<sub>7</sub></b>                                                                                                                                                                               | 305.42                         | 0.0169                | H-5→LUMO (79%), H-4→LUMO (13%)                  |
| <b>S<sub>8</sub></b>                                                                                                                                                                               | 304.19                         | 0.0                   | H-2→L+1 (80%), H-1→L+1 (17%)                    |
| <b>S<sub>9</sub></b>                                                                                                                                                                               | 301.01                         | 0.0321                | H-6→LUMO (40%), H-3→L+1 (43%)                   |
| <b>S<sub>10</sub></b>                                                                                                                                                                              | 298.24                         | 0.0002                | H-5→LUMO (13%), H-4→LUMO (85%)                  |
| <b>S<sub>11</sub></b>                                                                                                                                                                              | 282.97                         | 0.0001                | H-7→LUMO (95%)                                  |
| <b>S<sub>12</sub></b>                                                                                                                                                                              | 278.75                         | 0.1262                | H-6→LUMO (41%), H-5→L+1 (12%), H-3→L+1 (34%)    |
| <b>[Pt(dfppy)(C<sub>6</sub>F<sub>5</sub>)(CN)]<sup>-</sup> (<math>2^-</math>)</b>                                                                                                                  |                                |                       |                                                 |
| <b>State</b>                                                                                                                                                                                       | <b><math>\lambda</math>/nm</b> | <b><math>f</math></b> | <b>Transition (% Contribution)</b>              |
| <b>T<sub>1</sub></b>                                                                                                                                                                               | 434.70                         | 0.0                   | H-3→LUMO (20%), HOMO→LUMO (64%)                 |
| <b>T<sub>2</sub></b>                                                                                                                                                                               | 373.98                         | 0.0                   | H-2→LUMO (41%), H-1→LUMO (56%)                  |
| <b>T<sub>3</sub></b>                                                                                                                                                                               | 366.19                         | 0.0                   | H-3→LUMO (50%), HOMO→LUMO (30%)                 |
| <b>S<sub>1</sub></b>                                                                                                                                                                               | 364.95                         | 0.0338                | HOMO→LUMO (97%)                                 |
| <b>S<sub>2</sub></b>                                                                                                                                                                               | 358.52                         | 0.0061                | H-2→LUMO (40%), H-1→LUMO (60%)                  |
| <b>S<sub>3</sub></b>                                                                                                                                                                               | 339.47                         | 0.0001                | H-2→LUMO (59%), H-1→LUMO (39%)                  |
| <b>S<sub>4</sub></b>                                                                                                                                                                               | 309.60                         | 0.1026                | H-5→LUMO (25%), H-3→LUMO (66%)                  |
| <b>S<sub>5</sub></b>                                                                                                                                                                               | 302.02                         | 0.0491                | H-5→LUMO (35%), H-3→LUMO (15%), HOMO→L+1 (46%)  |
| <b>S<sub>6</sub></b>                                                                                                                                                                               | 292.62                         | 0.0009                | H-4→LUMO (94%)                                  |
| <b>S<sub>7</sub></b>                                                                                                                                                                               | 290.02                         | 0.0                   | H-2→L+1 (41%), H-1→L+1 (58%)                    |
| <b>S<sub>8</sub></b>                                                                                                                                                                               | 288.87                         | 0.2186                | H-5→LUMO (30%), HOMO→L+1 (50%)                  |
| <b>S<sub>9</sub></b>                                                                                                                                                                               | 277.28                         | 0.0001                | H-2→L+1 (57%), H-1→L+1 (39%)                    |
| <b>S<sub>10</sub></b>                                                                                                                                                                              | 267.78                         | 0.0001                | H-8→LUMO (12%), H-6→LUMO (84%)                  |
| <b>S<sub>11</sub></b>                                                                                                                                                                              | 261.05                         | 0.0989                | H-7→LUMO (10%), H-5→L+1 (18%), H-3→L+1 (42%)    |
| <b>S<sub>12</sub></b>                                                                                                                                                                              | 255.74                         | 0.0682                | H-7→LUMO (10%), H-2→L+3 (45%), H-1→L+3 (24%)    |

**Table S5. Composition (%) of Frontier MOs in terms of ligands and metals in the ground**

| state in THF for 1 <sup>-</sup> and 2 <sup>-</sup>                             |       |    |       |                 |                               |
|--------------------------------------------------------------------------------|-------|----|-------|-----------------|-------------------------------|
| [Pt(bzq)(C <sub>6</sub> F <sub>5</sub> )(CN)] <sup>-</sup> (1 <sup>-</sup> )   |       |    |       |                 |                               |
| MO                                                                             | eV    | Pt | bzq   | CN <sup>-</sup> | C <sub>6</sub> F <sub>5</sub> |
| LUMO+5                                                                         | 0.63  | 3  | 1     | 0               | 96                            |
| LUMO+4                                                                         | 0.62  | 1  | 2     | 0               | 97                            |
| LUMO+3                                                                         | 0.51  | 40 | 10    | 3               | 46                            |
| LUMO+2                                                                         | 0.14  | 8  | 87    | 2               | 2                             |
| LUMO+1                                                                         | -0.82 | 5  | 94    | 1               | 0                             |
| LUMO                                                                           | -1.39 | 3  | 96    | 0               | 0                             |
| HOMO                                                                           | -5.17 | 30 | 63    | 6               | 0                             |
| HOMO-1                                                                         | -5.50 | 71 | 7     | 1               | 21                            |
| HOMO-2                                                                         | -5.54 | 50 | 1     | 5               | 43                            |
| HOMO-3                                                                         | -5.84 | 40 | 55    | 1               | 4                             |
| HOMO-4                                                                         | -5.97 | 2  | 1     | 0               | 97                            |
| HOMO-5                                                                         | -6.21 | 55 | 38    | 5               | 2                             |
| [Pt(dfppy)(C <sub>6</sub> F <sub>5</sub> )(CN)] <sup>-</sup> (2 <sup>-</sup> ) |       |    |       |                 |                               |
| MO                                                                             | eV    | Pt | dfppy | CN <sup>-</sup> | C <sub>6</sub> F <sub>5</sub> |
| LUMO+5                                                                         | 0.58  | 5  | 1     | 1               | 94                            |
| LUMO+4                                                                         | 0.58  | 1  | 3     | 0               | 96                            |
| LUMO+3                                                                         | 0.44  | 38 | 13    | 3               | 46                            |
| LUMO+2                                                                         | 0.16  | 20 | 72    | 5               | 3                             |
| LUMO+1                                                                         | -0.57 | 1  | 99    | 0               | 0                             |
| LUMO                                                                           | -1.29 | 7  | 92    | 1               | 1                             |
| HOMO                                                                           | -5.46 | 41 | 50    | 9               | 0                             |
| HOMO-1                                                                         | -5.61 | 58 | 7     | 2               | 34                            |
| HOMO-2                                                                         | -5.64 | 63 | 0     | 3               | 33                            |
| HOMO-3                                                                         | -5.95 | 19 | 73    | 2               | 6                             |
| HOMO-4                                                                         | -6.01 | 2  | 4     | 0               | 94                            |
| HOMO-5                                                                         | -6.15 | 69 | 28    | 0               | 3                             |

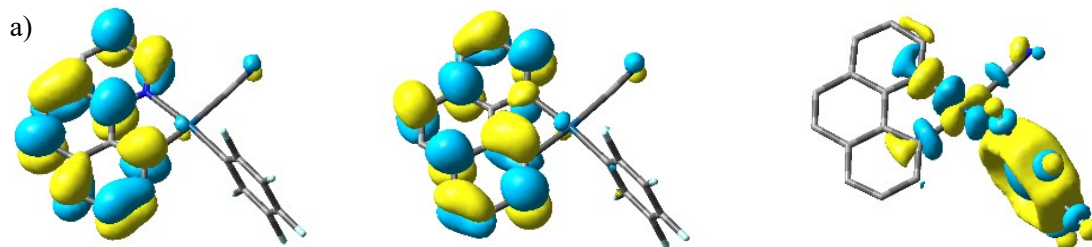

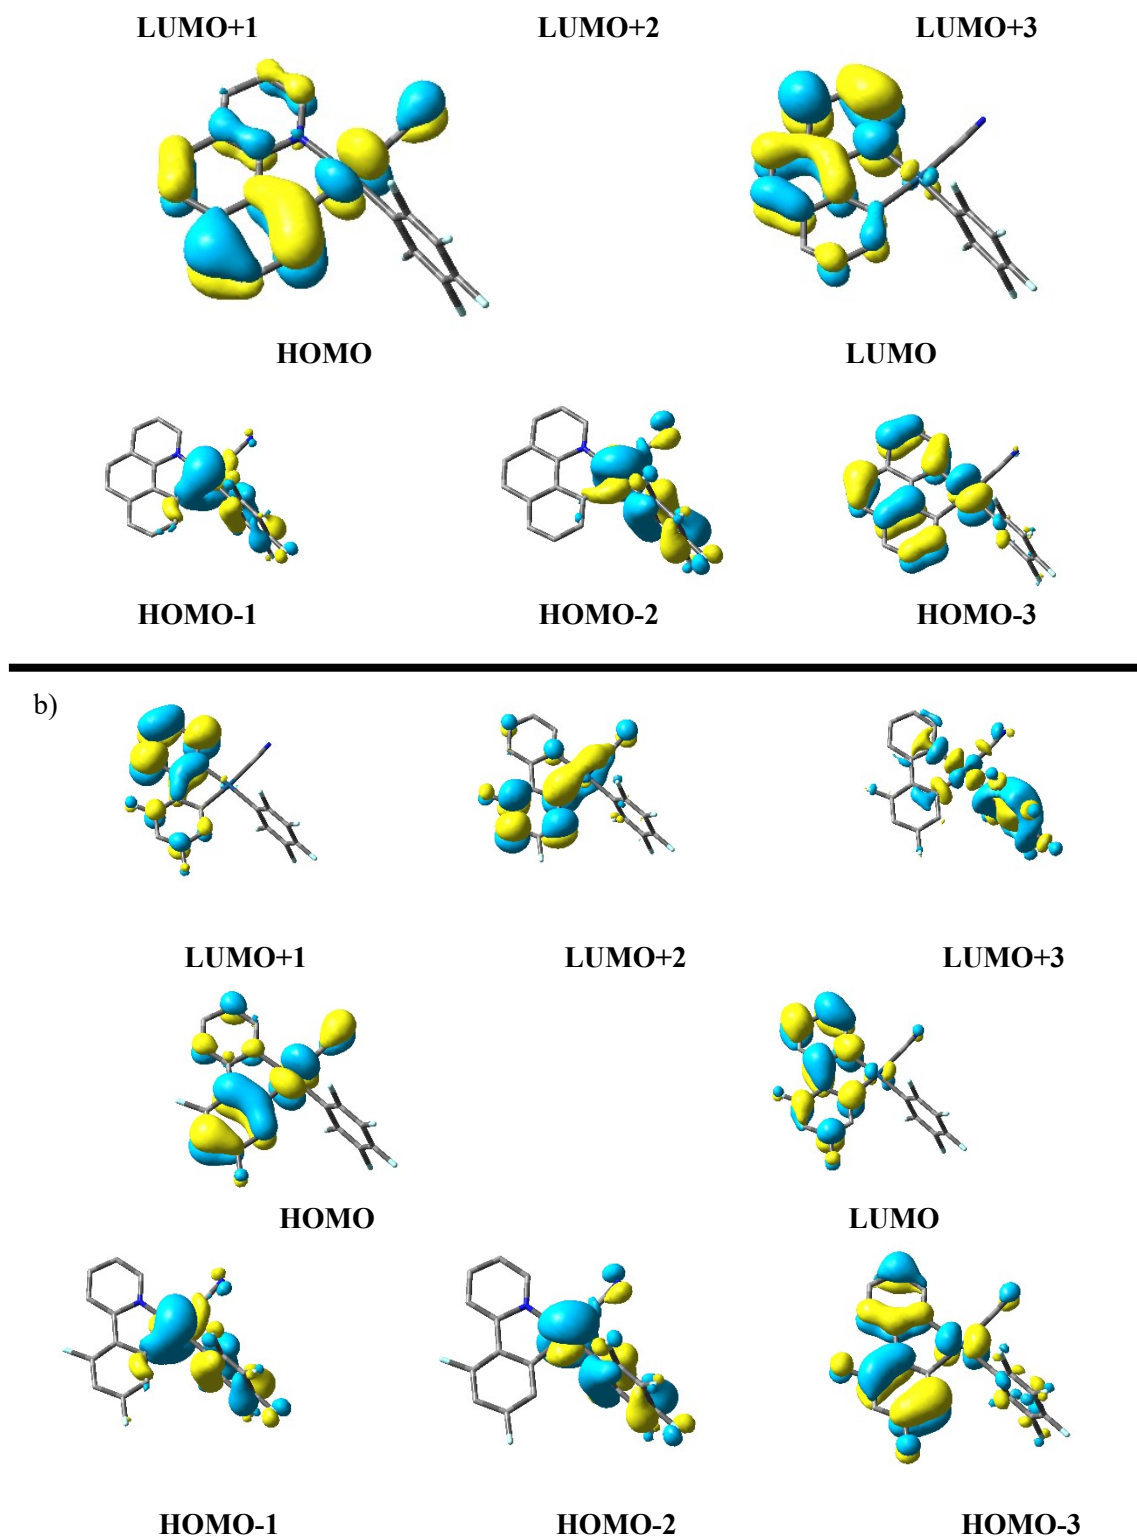

**Figure S11.** Selected frontier molecular orbitals for a)  $1^-$  and b)  $2^-$  in the ground state in THF.

|                                                                    |        |
|--------------------------------------------------------------------|--------|
| $[\text{Pt}(\text{bzq})(\text{C}_6\text{F}_5)(\text{CN})]^- (1^-)$ |        |
| SOMO                                                               | SOMO-1 |



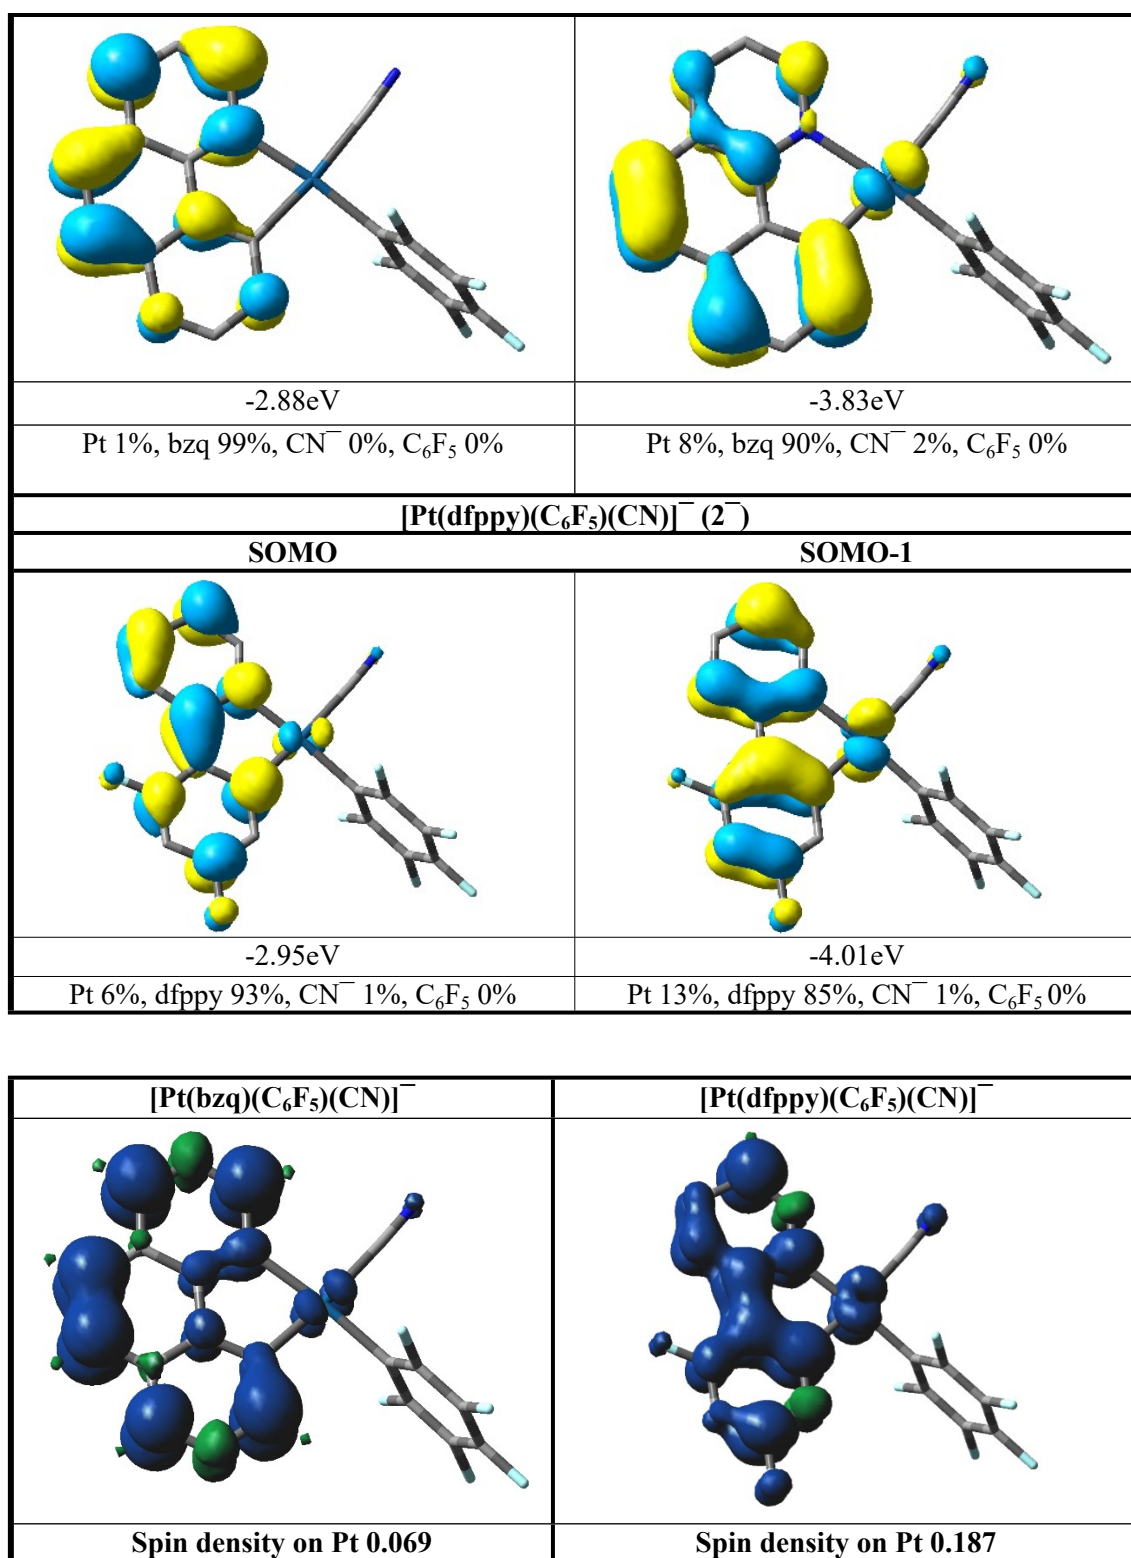

**Figure S12.** Plots and composition (%) of frontier MOs of the first triplet state and spin distribution for the lowest triplet excited state in the mononuclear 1<sup>-</sup> and 2<sup>-</sup> in THF.

**Table S6.** Selected vertical excitation energies singlets ( $S_n$ ) and first triplets computed by TD-DFT with the orbitals involved for **3**·(THF)<sub>3</sub> and **4**·(THF)<sub>3</sub>.

| <b>[Pt(bzq)(C<sub>6</sub>F<sub>5</sub>)(CN)Ti(THF)<sub>3</sub>] 3·(THF)<sub>3</sub></b>   |             |                 |                                                 |
|-------------------------------------------------------------------------------------------|-------------|-----------------|-------------------------------------------------|
| <b>State</b>                                                                              | <b>λ/nm</b> | <b><i>f</i></b> | <b>Transition (% Contribution)</b>              |
| <b>T<sub>1</sub></b>                                                                      | 464.984011  | 0.0             | H-3→LUMO (26%), HOMO→LUMO (19%), HOMO→L+1 (36%) |
| <b>T<sub>2</sub></b>                                                                      | 437.42357   | 0.0             | HOMO→LUMO (74%), HOMO→L+1 (15%)                 |
| <b>T<sub>3</sub></b>                                                                      | 384.563699  | 0.0             | H-3→LUMO (43%), HOMO→L+1 (34%)                  |
| <b>S<sub>1</sub></b>                                                                      | 389.321537  | 0.0501          | HOMO→LUMO (95%)                                 |
| <b>S<sub>2</sub></b>                                                                      | 362.66223   | 0.0206          | H-1→LUMO (97%)                                  |
| <b>S<sub>3</sub></b>                                                                      | 344.063651  | 0.0122          | H-2→LUMO (95%)                                  |
| <b>S<sub>4</sub></b>                                                                      | 329.883292  | 0.0316          | H-3→LUMO (36%), HOMO→L+1 (58%)                  |
| <b>S<sub>5</sub></b>                                                                      | 311.484616  | 0.1623          | H-3→LUMO (47%), H-1→L+1 (13%), HOMO→L+1 (31%)   |
| <b>S<sub>6</sub></b>                                                                      | 306.821096  | 0.0462          | H-1→L+1 (85%)                                   |
| <b>S<sub>7</sub></b>                                                                      | 299.766288  | 0.0137          | H-5→LUMO (13%), H-3→L+1 (12%), H-2→L+1 (64%)    |
| <b>S<sub>8</sub></b>                                                                      | 298.776626  | 0.0057          | H-4→LUMO (94%)                                  |
| <b>S<sub>9</sub></b>                                                                      | 294.94561   | 0.0207          | H-5→LUMO (21%), H-3→L+1 (33%), H-2→L+1 (30%)    |
| <b>S<sub>10</sub></b>                                                                     | 291.910947  | 0.0517          | H-6→LUMO (79%), H-5→LUMO (10%)                  |
| <b>S<sub>11</sub></b>                                                                     | 278.821006  | 0.0253          | H-5→LUMO (30%), HOMO→L+2 (47%)                  |
| <b>S<sub>12</sub></b>                                                                     | 277.417293  | 0.0047          | H-10→LUMO (23%), H-9→LUMO (26%), H-8→LUMO (33%) |
| <b>[Pt(dfppy)(C<sub>6</sub>F<sub>5</sub>)(CN)Ti(THF)<sub>3</sub>] 4·(THF)<sub>3</sub></b> |             |                 |                                                 |
| <b>State</b>                                                                              | <b>λ/nm</b> | <b><i>f</i></b> | <b>Transition (% Contribution)</b>              |
| <b>T<sub>1</sub></b>                                                                      | 432.479896  | 0.0             | H-3→LUMO (14%), HOMO→LUMO (68%)                 |
| <b>T<sub>2</sub></b>                                                                      | 364.667598  | 0.0             | H-2→LUMO (39%), H-1→LUMO (54%)                  |
| <b>T<sub>3</sub></b>                                                                      | 358.25051   | 0.0             | H-3→LUMO (50%), HOMO→LUMO (24%)                 |
| <b>S<sub>1</sub></b>                                                                      | 354.704287  | 0.0428          | HOMO→LUMO (96%)                                 |
| <b>S<sub>2</sub></b>                                                                      | 343.463174  | 0.0386          | H-2→LUMO (39%), H-1→LUMO (60%)                  |
| <b>S<sub>3</sub></b>                                                                      | 333.36023   | 0.01            | H-2→LUMO (59%), H-1→LUMO (38%)                  |
| <b>S<sub>4</sub></b>                                                                      | 307.208823  | 0.1163          | H-3→LUMO (86%)                                  |
| <b>S<sub>5</sub></b>                                                                      | 292.931687  | 0.0308          | H-5→LUMO (52%), H-4→LUMO (25%), HOMO→L+1 (18%)  |
| <b>S<sub>6</sub></b>                                                                      | 292.434221  | 0.0095          | H-5→LUMO (17%), H-4→LUMO (74%)                  |
| <b>S<sub>7</sub></b>                                                                      | 279.973211  | 0.1422          | H-5→LUMO (14%), H-1→L+1 (18%), HOMO→L+1 (48%)   |
| <b>S<sub>8</sub></b>                                                                      | 278.758317  | 0.0549          | H-2→L+1 (35%), H-1→L+1 (39%), HOMO→L+1 (15%)    |
| <b>S<sub>9</sub></b>                                                                      | 271.452767  | 0.0008          | H-7→LUMO (77%), H-6→LUMO (11%)                  |
| <b>S<sub>10</sub></b>                                                                     | 269.933894  | 0.0138          | H-2→L+1 (49%), H-1→L+1 (35%)                    |
| <b>S<sub>11</sub></b>                                                                     | 266.504743  | 0.0056          | H-9→LUMO (27%), H-7→LUMO (10%), H-6→LUMO (51%)  |
| <b>S<sub>12</sub></b>                                                                     | 264.24411   | 0.1127          | HOMO→L+2 (68%)                                  |

**Table S7.** Composition (%) of Frontier MOs in terms of ligands and metals in the ground state for **3**·(THF)<sub>3</sub> and **4**·(THF)<sub>3</sub>.

| <b>[Pt(bzq)(C<sub>6</sub>F<sub>5</sub>)(CN)Ti(THF)<sub>3</sub>] 3·(THF)<sub>3</sub></b>   |           |           |           |              |                       |                                   |            |
|-------------------------------------------------------------------------------------------|-----------|-----------|-----------|--------------|-----------------------|-----------------------------------|------------|
| <b>MO</b>                                                                                 | <b>eV</b> | <b>Pt</b> | <b>Ti</b> | <b>bzq</b>   | <b>CN<sup>-</sup></b> | <b>C<sub>6</sub>F<sub>5</sub></b> | <b>THF</b> |
| <b>LUMO+5</b>                                                                             | 0.14      | 4         | 11        | 6            | 0                     | 78                                | 2          |
| <b>LUMO+4</b>                                                                             | -0.13     | 13        | 28        | 40           | 1                     | 15                                | 4          |
| <b>LUMO+3</b>                                                                             | -0.28     | 22        | 42        | 15           | 1                     | 14                                | 5          |
| <b>LUMO+2</b>                                                                             | -0.54     | 9         | 42        | 41           | 3                     | 2                                 | 3          |
| <b>LUMO+1</b>                                                                             | -1.27     | 5         | 5         | 87           | 2                     | 0                                 | 0          |
| <b>LUMO</b>                                                                               | -1.83     | 4         | 2         | 93           | 0                     | 1                                 | 0          |
| <b>HOMO</b>                                                                               | -5.68     | 21        | 1         | 73           | 4                     | 0                                 | 1          |
| <b>HOMO-1</b>                                                                             | -5.98     | 65        | 17        | 4            | 1                     | 6                                 | 7          |
| <b>HOMO-2</b>                                                                             | -6.05     | 26        | 1         | 6            | 6                     | 62                                | 0          |
| <b>HOMO-3</b>                                                                             | -6.36     | 16        | 0         | 77           | 1                     | 6                                 | 0          |
| <b>HOMO-4</b>                                                                             | -6.43     | 1         | 0         | 3            | 0                     | 95                                | 0          |
| <b>HOMO-5</b>                                                                             | -6.81     | 32        | 0         | 53           | 12                    | 0                                 | 2          |
| <b>[Pt(dfppy)(C<sub>6</sub>F<sub>5</sub>)(CN)Ti(THF)<sub>3</sub>] 4·(THF)<sub>3</sub></b> |           |           |           |              |                       |                                   |            |
| <b>MO</b>                                                                                 | <b>eV</b> | <b>Pt</b> | <b>Ti</b> | <b>dfppy</b> | <b>CN<sup>-</sup></b> | <b>C<sub>6</sub>F<sub>5</sub></b> | <b>THF</b> |
| <b>LUMO+5</b>                                                                             | 0.08      | 2         | 1         | 4            | 0                     | 92                                | 0          |
| <b>LUMO+4</b>                                                                             | -0.01     | 6         | 14        | 26           | 1                     | 52                                | 1          |
| <b>LUMO+3</b>                                                                             | -0.36     | 25        | 32        | 13           | 2                     | 24                                | 4          |
| <b>LUMO+2</b>                                                                             | -0.65     | 11        | 47        | 35           | 4                     | 2                                 | 1          |
| <b>LUMO+1</b>                                                                             | -1.01     | 1         | 3         | 96           | 0                     | 0                                 | 0          |
| <b>LUMO</b>                                                                               | -1.79     | 8         | 5         | 85           | 1                     | 1                                 | 0          |
| <b>HOMO</b>                                                                               | -6.04     | 30        | 1         | 63           | 6                     | 0                                 | 0          |
| <b>HOMO-1</b>                                                                             | -6.17     | 46        | 8         | 7            | 1                     | 35                                | 2          |
| <b>HOMO-2</b>                                                                             | -6.18     | 47        | 10        | 1            | 4                     | 36                                | 2          |
| <b>HOMO-3</b>                                                                             | -6.43     | 11        | 0         | 83           | 3                     | 2                                 | 1          |
| <b>HOMO-4</b>                                                                             | -6.52     | 1         | 0         | 1            | 0                     | 97                                | 0          |
| <b>HOMO-5</b>                                                                             | -6.86     | 75        | 0         | 18           | 1                     | 3                                 | 3          |

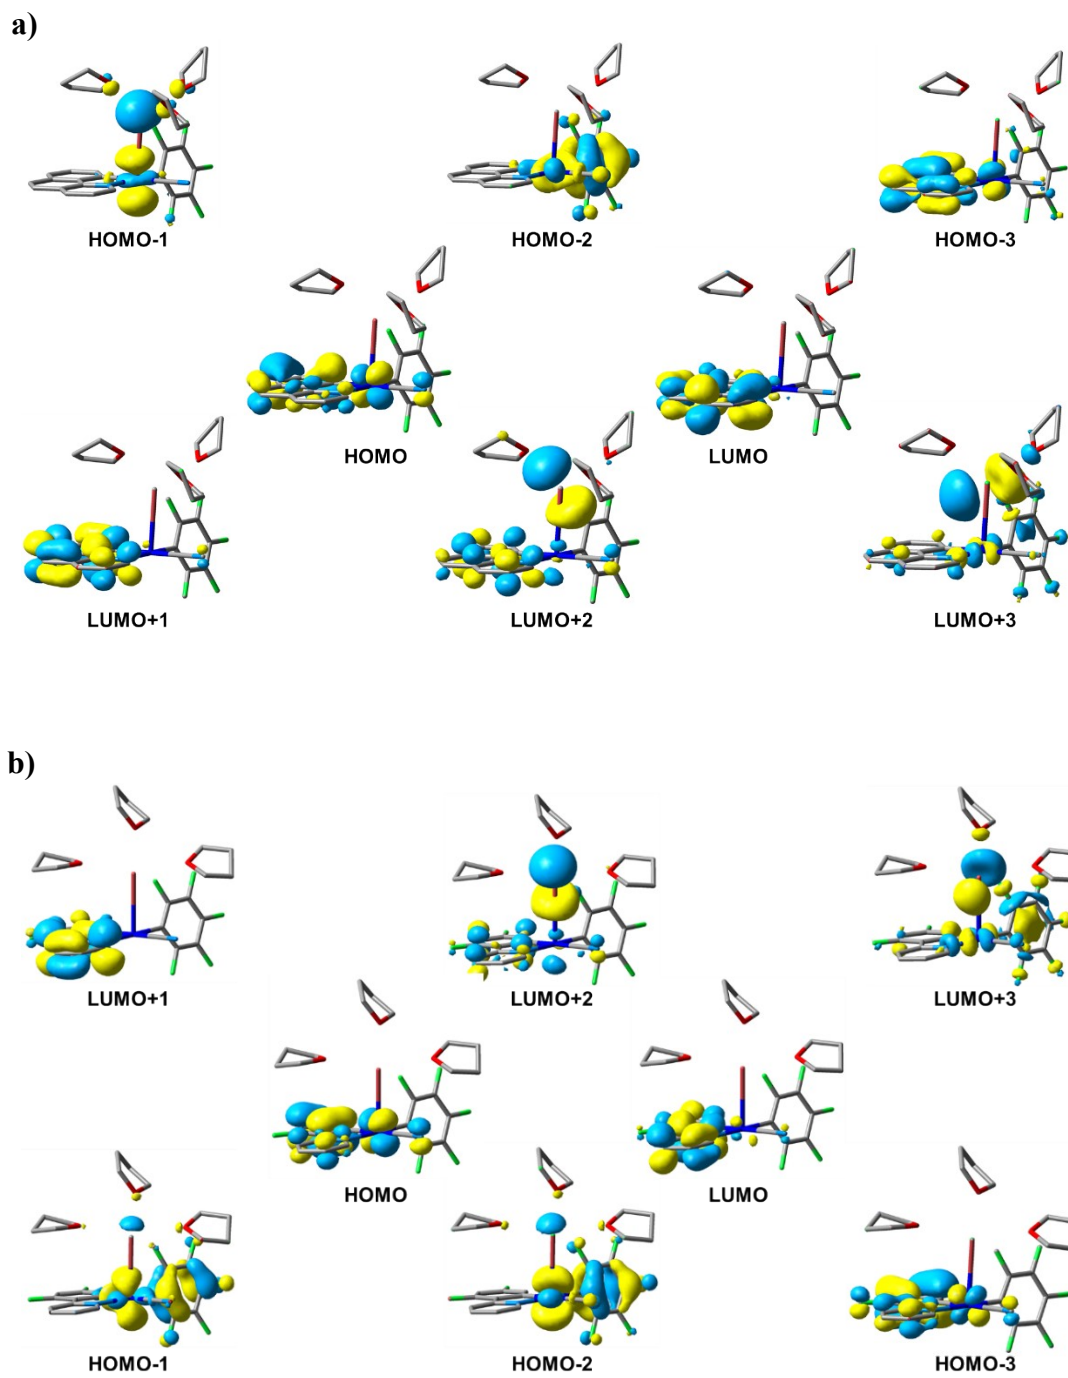

**Figure S13.** Selected frontier molecular orbitals for the models a)  $3 \cdot (\text{THF})_3$  and b)  $4 \cdot (\text{THF})_3$  in the ground state.

**Table S8.** Selected vertical excitation energies singlets ( $S_n$ ) and first triplets computed by TDDFT (**Solid State**) with the orbitals involved for  $1^-$ ,  $2^-$ , **3** and **4**.

| <b>[Pt(bzq)(C<sub>6</sub>F<sub>5</sub>)(CN)]<sup>-</sup> (<b>1<sup>-</sup></b>)</b>                      |               |        |                                               |
|----------------------------------------------------------------------------------------------------------|---------------|--------|-----------------------------------------------|
| State                                                                                                    | $\lambda$ /nm | $f$    | Transition (% Contribution)                   |
| <b>T<sub>1</sub></b>                                                                                     | 506.66        | -      | HOMO→LUMO (87%)                               |
| <b>T<sub>2</sub></b>                                                                                     | 474.62        | -      | H-3→LUMO (24%), HOMO→L+1 (37%)                |
| <b>T<sub>3</sub></b>                                                                                     | 463.63        | -      | H-1→LUMO (95%)                                |
| <b>S<sub>1</sub></b>                                                                                     | 456.60        | 0.0144 | HOMO→LUMO (96%)                               |
| <b>S<sub>2</sub></b>                                                                                     | 452.78        | 0.0009 | H-1→LUMO (98%)                                |
| <b>S<sub>3</sub></b>                                                                                     | 418.34        | 0.0    | H-2→LUMO (97%)                                |
| <b>S<sub>4</sub></b>                                                                                     | 375.33        | 0.0163 | H-3→LUMO (20%), HOMO→L+1 (73%)                |
| <b>S<sub>5</sub></b>                                                                                     | 367.07        | 0.0019 | H-1→L+1 (98%)                                 |
| <b>S<sub>6</sub></b>                                                                                     | 348.64        | 0.1402 | H-3→LUMO (58%), HOMO→L+1 (23%)                |
| <b>S<sub>7</sub></b>                                                                                     | 347.49        | 0.0    | H-2→L+1 (97%)                                 |
| <b>S<sub>8</sub></b>                                                                                     | 336.85        | 0.0034 | H-4→LUMO (85%), H-3→LUMO (13%)                |
| <b>S<sub>9</sub></b>                                                                                     | 326.40        | 0.0225 | H-5→LUMO (60%), H-3→L+1 (28%)                 |
| <b>S<sub>10</sub></b>                                                                                    | 323.58        | 0.0    | H-6→LUMO (92%)                                |
| <b>S<sub>11</sub></b>                                                                                    | 314.45        | 0.0186 | H-7→LUMO (19%), H-5→LUMO (24%), H-3→L+1 (43%) |
| <b>S<sub>12</sub></b>                                                                                    | 301.05        | 0.0524 | H-7→LUMO (62%), H-5→L+1 (11%), H-3→L+1 (13%)  |
| <b>[Pt(dfppy)(C<sub>6</sub>F<sub>5</sub>)(CN)]<sup>-</sup> (<b>2<sup>-</sup></b>)</b>                    |               |        |                                               |
| State                                                                                                    | $\lambda$ /nm | $f$    | Transition (% Contribution)                   |
| <b>T<sub>1</sub></b>                                                                                     | 458.17        | -      | HOMO→LUMO (77%)                               |
| <b>T<sub>2</sub></b>                                                                                     | 431.88        | -      | H-1→LUMO (94%)                                |
| <b>T<sub>3</sub></b>                                                                                     | 399.85        | -      | H-4→LUMO (59%), HOMO→LUMO (18%)               |
| <b>S<sub>1</sub></b>                                                                                     | 415.27        | 0.0022 | H-1→LUMO (97%)                                |
| <b>S<sub>2</sub></b>                                                                                     | 409.74        | 0.0138 | HOMO→LUMO (96%)                               |
| <b>S<sub>3</sub></b>                                                                                     | 386.68        | 0.0    | H-2→LUMO (95%)                                |
| <b>S<sub>4</sub></b>                                                                                     | 337.51        | 0.0253 | H-4→LUMO (56%), HOMO→L+1 (38%)                |
| <b>S<sub>5</sub></b>                                                                                     | 333.77        | 0.0    | H-1→L+1 (95%)                                 |
| <b>S<sub>6</sub></b>                                                                                     | 329.89        | 0.0645 | H-4→LUMO (35%), HOMO→L+1 (59%)                |
| <b>S<sub>7</sub></b>                                                                                     | 320.14        | 0.0002 | H-3→LUMO (99%)                                |
| <b>S<sub>8</sub></b>                                                                                     | 316.04        | 0.0    | H-2→L+1 (93%)                                 |
| <b>S<sub>9</sub></b>                                                                                     | 302.06        | 0.068  | H-5→LUMO (62%), H-4→L+1 (31%)                 |
| <b>S<sub>10</sub></b>                                                                                    | 300.63        | 0.0    | H-6→LUMO (88%)                                |
| <b>S<sub>11</sub></b>                                                                                    | 279.61        | 0.1476 | H-5→LUMO (21%), H-4→L+1 (53%)                 |
| <b>S<sub>12</sub></b>                                                                                    | 279.60        | 0.0047 | H-7→LUMO (86%)                                |
| <b>3 (optimized model Pt<sub>4</sub>Tl<sub>4</sub> based on the reported crystallographic structure)</b> |               |        |                                               |
| State                                                                                                    | $\lambda$ /nm | $f$    | Transition (% Contribution)                   |
| <b>T<sub>1</sub></b>                                                                                     | 537.24        | -      | HOMO→LUMO (90%)                               |
| <b>T<sub>2</sub></b>                                                                                     | 488.15        | -      | H-1→L+1 (75%)                                 |
| <b>T<sub>3</sub></b>                                                                                     | 472.83        | -      | H-13→L+2 (12%), H-3→L+2 (40%), H-3→L+7 (15%)  |
| <b>S<sub>1</sub></b>                                                                                     | 443.43        | 0.0791 | H-1→LUMO (24%), HOMO→LUMO (66%)               |
| <b>S<sub>2</sub></b>                                                                                     | 439.78        | 0.0008 | H-1→LUMO (56%), HOMO→LUMO (32%)               |
| <b>S<sub>3</sub></b>                                                                                     | 431.18        | 0.1502 | H-1→LUMO (11%), H-1→L+1 (12%), HOMO→L+1 (69%) |
| <b>S<sub>4</sub></b>                                                                                     | 422.88        | 0.0835 | H-3→LUMO (27%), H-2→LUMO (52%)                |
| <b>S<sub>5</sub></b>                                                                                     | 418.81        | 0.0023 | H-1→L+2 (16%), HOMO→L+2 (71%)                 |
| <b>S<sub>6</sub></b>                                                                                     | 414.94        | 0.0248 | H-3→LUMO (32%), H-2→LUMO (19%), H-2→L+1 (15%) |
| <b>S<sub>7</sub></b>                                                                                     | 412.03        | 0.005  | H-3→LUMO (14%), H-1→L+1 (59%), HOMO→L+1 (13%) |

|                                                         |             |          |                                                                                |
|---------------------------------------------------------|-------------|----------|--------------------------------------------------------------------------------|
| <b>S<sub>8</sub></b>                                    | 408.04      | 0.0091   | H-3→LUMO (13%), H-3→L+1 (31%), H-2→LUMO (19%),<br>H-2→L+1 (16%)                |
| <b>S<sub>9</sub></b>                                    | 403.63      | 0.0018   | H-5→LUMO (10%), H-4→LUMO (79%)                                                 |
| <b>S<sub>10</sub></b>                                   | 401.99      | 0.0029   | H-5→LUMO (62%), H-4→LUMO (15%)                                                 |
| <b>S<sub>11</sub></b>                                   | 398.69      | 0.0015   | H-3→L+1 (36%), H-2→L+1 (46%)                                                   |
| <b>S<sub>12</sub></b>                                   | 395.96      | 0.0168   | H-3→L+1 (11%), H-3→L+2 (14%), H-2→L+2 (11%), H-<br>1→L+3 (21%), HOMO→L+3 (11%) |
| <b>4 (optimized model Pt<sub>4</sub>Tl<sub>4</sub>)</b> |             |          |                                                                                |
| <b>State</b>                                            | <b>λ/nm</b> | <b>f</b> | <b>Transition (% Contribution)</b>                                             |
| <b>T<sub>1</sub></b>                                    | 439.30      | -        | H-1→L+2 (19%), HOMO→LUMO (11%), HOMO→L+3<br>(16%)                              |
| <b>T<sub>2</sub></b>                                    | 439.29      | -        | H-1→L+3 (11%), HOMO→L+2 (15%)                                                  |
| <b>T<sub>3</sub></b>                                    | 438.65      | -        | H-11→L+1 (32%), H-10→LUMO (33%)                                                |
| <b>S<sub>1</sub></b>                                    | 383.64      | 0.0018   | H-2→LUMO (19%), H-1→LUMO (59%)                                                 |
| <b>S<sub>2</sub></b>                                    | 383.54      | 0.2258   | HOMO→LUMO (89%)                                                                |
| <b>S<sub>3</sub></b>                                    | 378.34      | 0.0      | H-2→LUMO (70%), H-1→LUMO (20%)                                                 |
| <b>S<sub>4</sub></b>                                    | 375.37      | 0.0643   | H-3→LUMO (93%)                                                                 |
| <b>S<sub>5</sub></b>                                    | 366.52      | 0.0      | H-4→LUMO (27%), H-1→LUMO (12%), HOMO→L+1<br>(42%)                              |
| <b>S<sub>6</sub></b>                                    | 365.08      | 0.1146   | H-5→LUMO (20%), H-2→L+1 (22%), H-1→L+1 (37%)                                   |
| <b>S<sub>7</sub></b>                                    | 364.05      | 0.0      | H-4→LUMO (56%), HOMO→L+1 (37%)                                                 |
| <b>S<sub>8</sub></b>                                    | 361.82      | 0.0301   | H-5→LUMO (61%), H-1→L+1 (33%)                                                  |
| <b>S<sub>9</sub></b>                                    | 358.91      | 0.019    | H-10→LUMO (15%), H-2→L+1 (59%)                                                 |
| <b>S<sub>10</sub></b>                                   | 357.86      | 0.0      | H-11→LUMO (17%), H-3→L+1 (59%)                                                 |
| <b>S<sub>11</sub></b>                                   | 355.72      | 0.0      | H-11→LUMO (34%), H-10→L+1 (18%), H-3→L+1 (31%)                                 |
| <b>S<sub>12</sub></b>                                   | 354.94      | 0.0336   | H-11→L+1 (16%), H-10→LUMO (38%), H-2→L+1 (15%),<br>H-1→L+1 (14%)               |

**Table S9.** Composition (%) of Frontier MOs in terms of ligands and metals in the ground state in solid state for **1<sup>-</sup>**, **2<sup>-</sup>**, **3** and **4**.

| <b>[Pt(bzq)(C<sub>6</sub>F<sub>5</sub>)(CN)]<sup>-</sup></b> |           |           |            |                       |                                   |
|--------------------------------------------------------------|-----------|-----------|------------|-----------------------|-----------------------------------|
| <b>MO</b>                                                    | <b>eV</b> | <b>Pt</b> | <b>bzq</b> | <b>CN<sup>-</sup></b> | <b>C<sub>6</sub>F<sub>5</sub></b> |
| <b>LUMO+5</b>                                                | 3.31      | 3         | 1          | 0                     | 95                                |
| <b>LUMO+4</b>                                                | 3.30      | 3         | 18         | 0                     | 79                                |
| <b>LUMO+3</b>                                                | 3.16      | 42        | 10         | 3                     | 46                                |
| <b>LUMO+2</b>                                                | 2.47      | 4         | 94         | 1                     | 1                                 |
| <b>LUMO+1</b>                                                | 1.46      | 3         | 96         | 1                     | 0                                 |
| <b>LUMO</b>                                                  | 0.84      | 3         | 97         | 0                     | 0                                 |
| <b>HOMO</b>                                                  | -2.55     | 44        | 41         | 14                    | 0                                 |
| <b>HOMO-1</b>                                                | -2.70     | 93        | 3          | 0                     | 5                                 |
| <b>HOMO-2</b>                                                | -2.75     | 31        | 6          | 10                    | 53                                |
| <b>HOMO-3</b>                                                | -3.25     | 68        | 19         | 0                     | 12                                |
| <b>HOMO-4</b>                                                | -3.27     | 8         | 1          | 0                     | 90                                |

|                                                                                                          |           |           |              |                       |                                   |                                   |            |
|----------------------------------------------------------------------------------------------------------|-----------|-----------|--------------|-----------------------|-----------------------------------|-----------------------------------|------------|
| <b>HOMO-5</b>                                                                                            | -3.65     | 20        | 61           | 18                    | 1                                 |                                   |            |
| <b>[Pt(dfppy)(C<sub>6</sub>F<sub>5</sub>)(CN)]<sup>-</sup></b>                                           |           |           |              |                       |                                   |                                   |            |
| <b>MO</b>                                                                                                | <b>eV</b> | <b>Pt</b> | <b>dfppy</b> | <b>CN<sup>-</sup></b> | <b>C<sub>6</sub>F<sub>5</sub></b> |                                   |            |
| <b>LUMO+5</b>                                                                                            | 3.21      | 5         | 1            | 1                     | 94                                |                                   |            |
| <b>LUMO+4</b>                                                                                            | 3.21      | 1         | 7            | 0                     | 92                                |                                   |            |
| <b>LUMO+3</b>                                                                                            | 3.03      | 40        | 13           | 3                     | 44                                |                                   |            |
| <b>LUMO+2</b>                                                                                            | 2.64      | 13        | 83           | 3                     | 1                                 |                                   |            |
| <b>LUMO+1</b>                                                                                            | 1.62      | 1         | 99           | 0                     | 0                                 |                                   |            |
| <b>LUMO</b>                                                                                              | 0.99      | 5         | 93           | 1                     | 0                                 |                                   |            |
| <b>HOMO</b>                                                                                              | -2.82     | 51        | 32           | 17                    | 0                                 |                                   |            |
| <b>HOMO-1</b>                                                                                            | -2.87     | 90        | 4            | 0                     | 7                                 |                                   |            |
| <b>HOMO-2</b>                                                                                            | -2.91     | 33        | 4            | 9                     | 54                                |                                   |            |
| <b>HOMO-3</b>                                                                                            | -3.35     | 0         | 0            | 0                     | 99                                |                                   |            |
| <b>HOMO-4</b>                                                                                            | -3.42     | 75        | 21           | 1                     | 3                                 |                                   |            |
| <b>HOMO-5</b>                                                                                            | -3.70     | 13        | 84           | 2                     | 1                                 |                                   |            |
| <b>3 (optimized model Pt<sub>4</sub>Tl<sub>4</sub> based on the reported crystallographic structure)</b> |           |           |              |                       |                                   |                                   |            |
| <b>MO</b>                                                                                                | <b>eV</b> | <b>Pt</b> | <b>Tl</b>    | <b>bzq</b>            | <b>CN<sup>-</sup></b>             | <b>C<sub>6</sub>F<sub>5</sub></b> | <b>THF</b> |
| <b>LUMO+5</b>                                                                                            | -1.66     | 5         | 14           | 78                    | 2                                 | 1                                 | 0          |
| <b>LUMO+4</b>                                                                                            | -1.78     | 4         | 13           | 80                    | 2                                 | 0                                 | 0          |
| <b>LUMO+3</b>                                                                                            | -1.94     | 5         | 5            | 89                    | 1                                 | 1                                 | 0          |
| <b>LUMO+2</b>                                                                                            | -2.01     | 5         | 3            | 90                    | 1                                 | 1                                 | 0          |
| <b>LUMO+1</b>                                                                                            | -2.19     | 8         | 10           | 78                    | 2                                 | 2                                 | 0          |
| <b>LUMO</b>                                                                                              | -2.33     | 9         | 12           | 75                    | 2                                 | 2                                 | 0          |
| <b>HOMO</b>                                                                                              | -5.36     | 46        | 32           | 12                    | 4                                 | 5                                 | 2          |
| <b>HOMO-1</b>                                                                                            | -5.49     | 47        | 30           | 12                    | 3                                 | 7                                 | 0          |
| <b>HOMO-2</b>                                                                                            | -5.71     | 18        | 1            | 60                    | 3                                 | 19                                | 0          |
| <b>HOMO-3</b>                                                                                            | -5.73     | 19        | 1            | 74                    | 3                                 | 3                                 | 0          |
| <b>HOMO-4</b>                                                                                            | -5.81     | 24        | 1            | 16                    | 3                                 | 56                                | 0          |
| <b>HOMO-5</b>                                                                                            | -5.83     | 23        | 2            | 6                     | 3                                 | 66                                | 0          |
| <b>4 (optimized model Pt<sub>4</sub>Tl<sub>4</sub>)</b>                                                  |           |           |              |                       |                                   |                                   |            |
| <b>MO</b>                                                                                                | <b>eV</b> | <b>Pt</b> | <b>Tl</b>    | <b>dfppy</b>          | <b>CN<sup>-</sup></b>             | <b>C<sub>6</sub>F<sub>5</sub></b> |            |
| <b>LUMO+5</b>                                                                                            | -1.59     | 4         | 58           | 34                    | 2                                 | 2                                 |            |
| <b>LUMO+4</b>                                                                                            | -1.61     | 7         | 61           | 28                    | 2                                 | 3                                 |            |
| <b>LUMO+3</b>                                                                                            | -1.96     | 7         | 3            | 88                    | 1                                 | 1                                 |            |
| <b>LUMO+2</b>                                                                                            | -1.97     | 7         | 7            | 82                    | 2                                 | 1                                 |            |
| <b>LUMO+1</b>                                                                                            | -2.37     | 12        | 18           | 67                    | 2                                 | 2                                 |            |
| <b>LUMO</b>                                                                                              | -2.51     | 15        | 25           | 53                    | 5                                 | 2                                 |            |
| <b>HOMO</b>                                                                                              | -6.18     | 34        | 9            | 50                    | 3                                 | 3                                 |            |
| <b>HOMO-1</b>                                                                                            | -6.21     | 32        | 10           | 53                    | 2                                 | 3                                 |            |
| <b>HOMO-2</b>                                                                                            | -6.22     | 25        | 4            | 17                    | 3                                 | 51                                |            |
| <b>HOMO-3</b>                                                                                            | -6.24     | 24        | 3            | 9                     | 2                                 | 61                                |            |
| <b>HOMO-4</b>                                                                                            | -6.34     | 33        | 9            | 21                    | 3                                 | 35                                |            |
| <b>HOMO-5</b>                                                                                            | -6.35     | 32        | 11           | 32                    | 2                                 | 23                                |            |

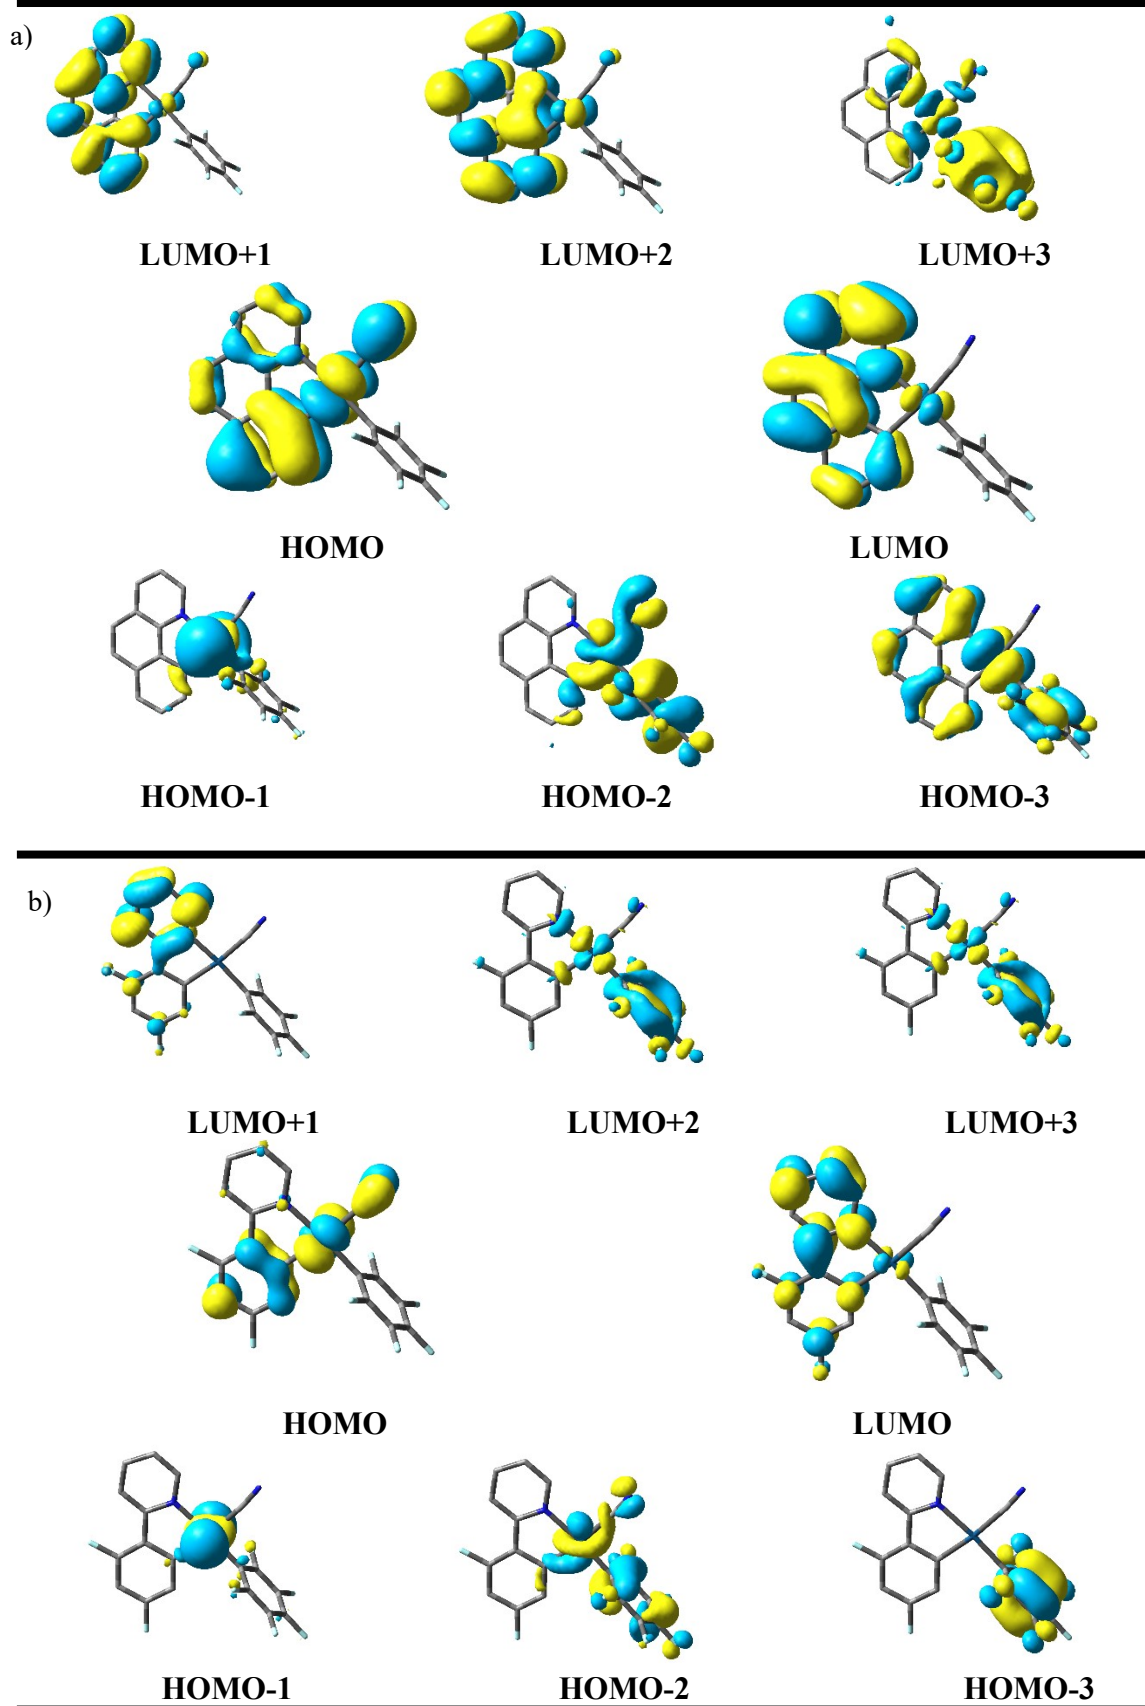

**Figure S14.** Selected frontier molecular orbitals for a) **1** and b) **2** and in the ground state in **solid state**.



3 (optimized model Pt<sub>4</sub>Tl<sub>4</sub> based on the reported crystallographic structure)

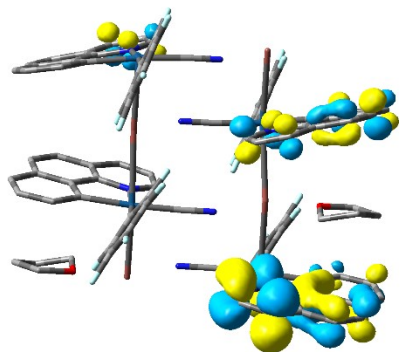

LUMO+3

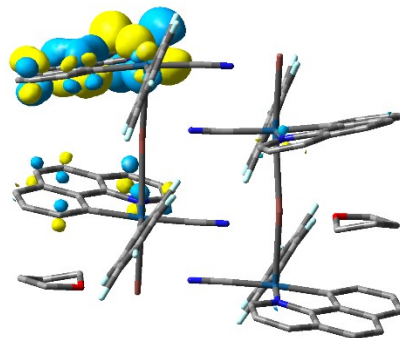

LUMO+2

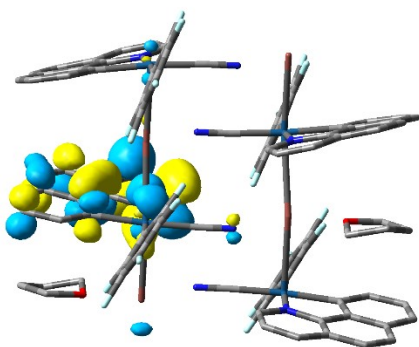

LUMO+1

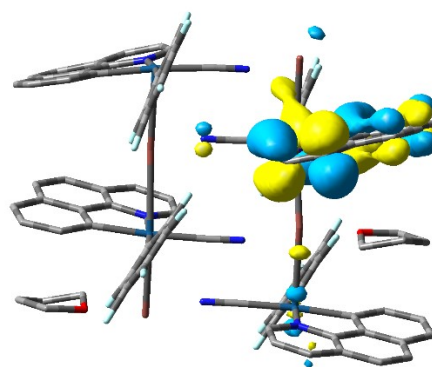

LUMO

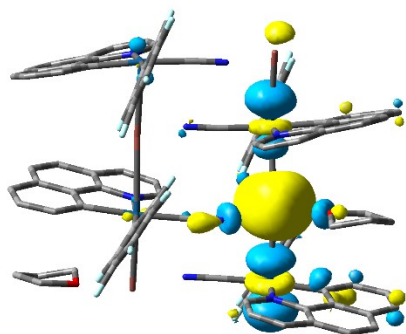

HOMO

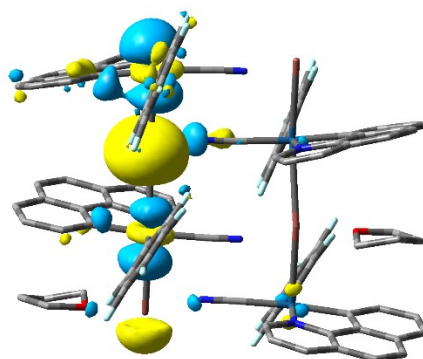

HOMO-1

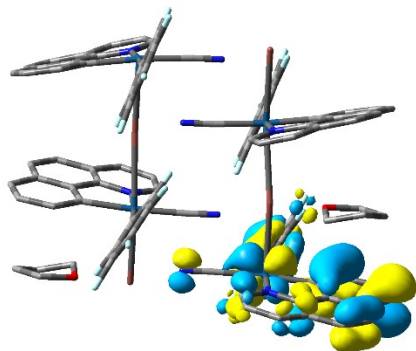

HOMO-2

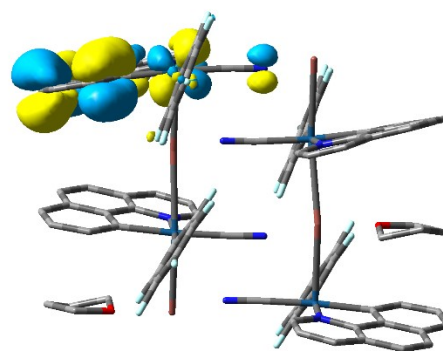

HOMO-3

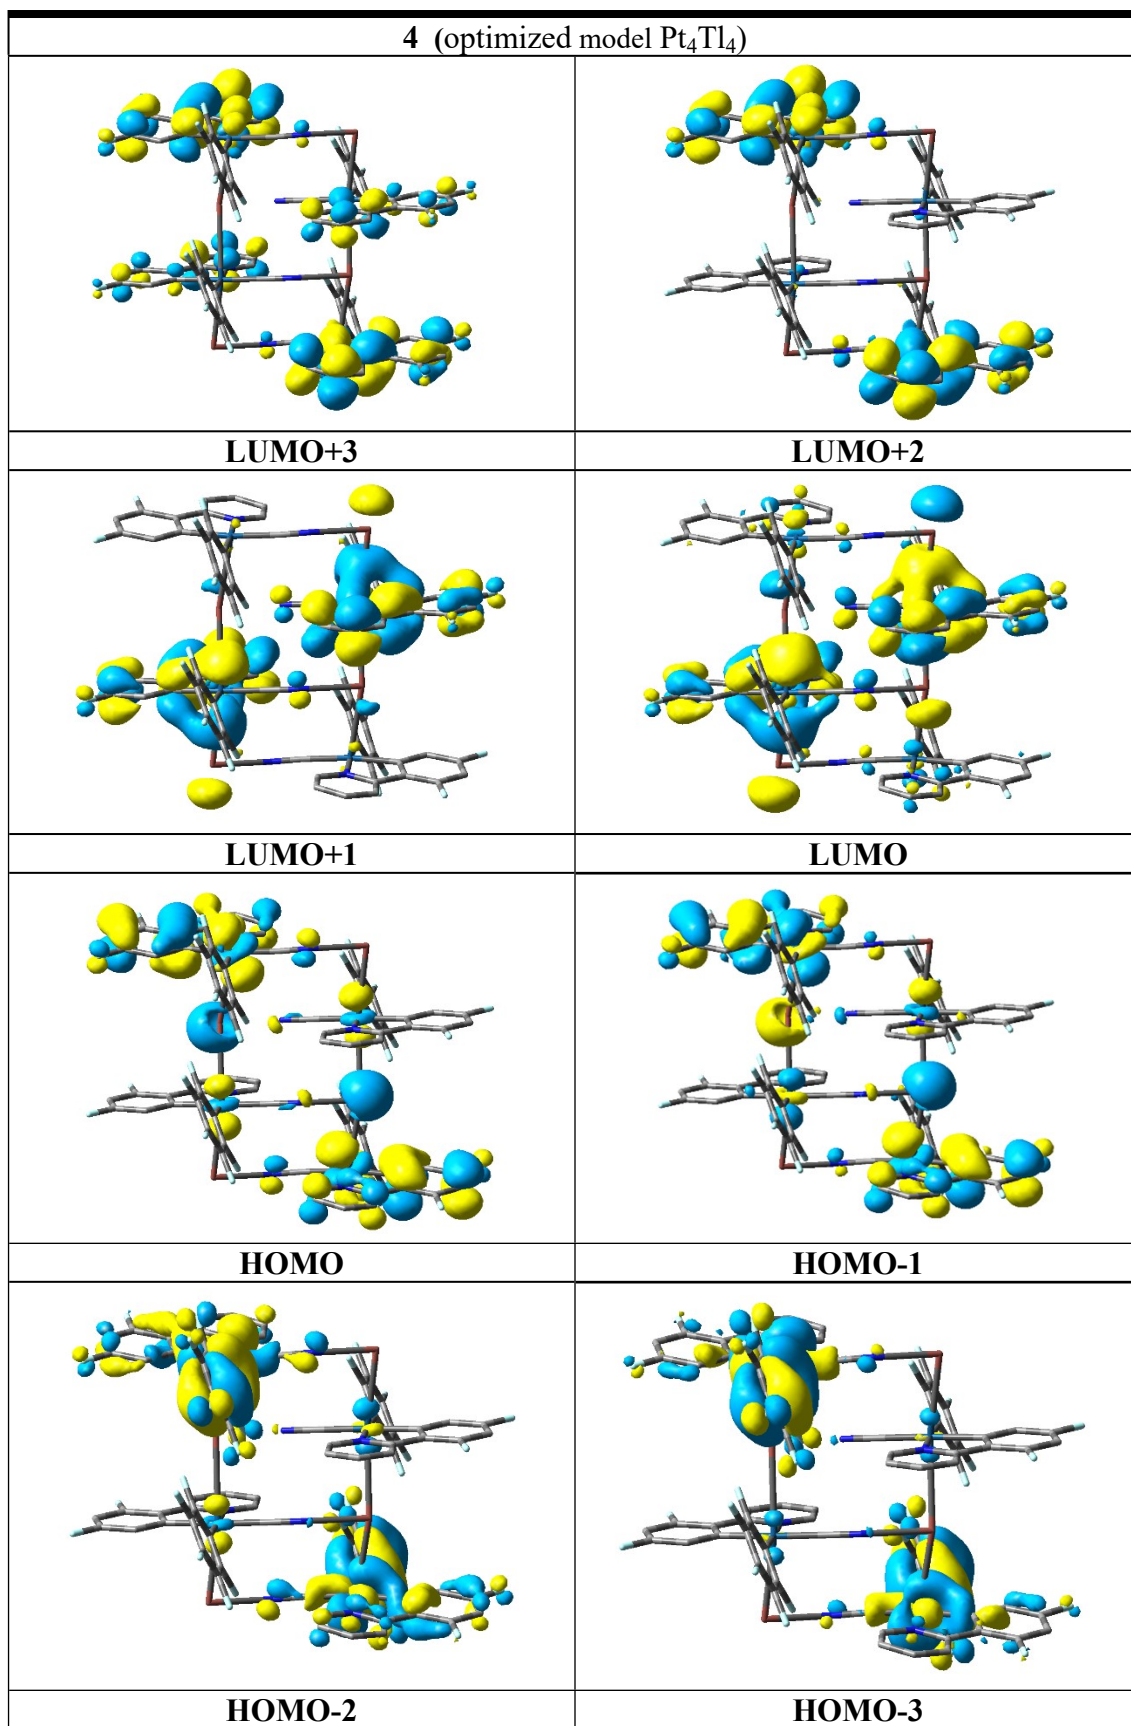

Figure S15. Plots and composition (%) of frontier MOs of the first triplet state in solid state for 3 and 4.

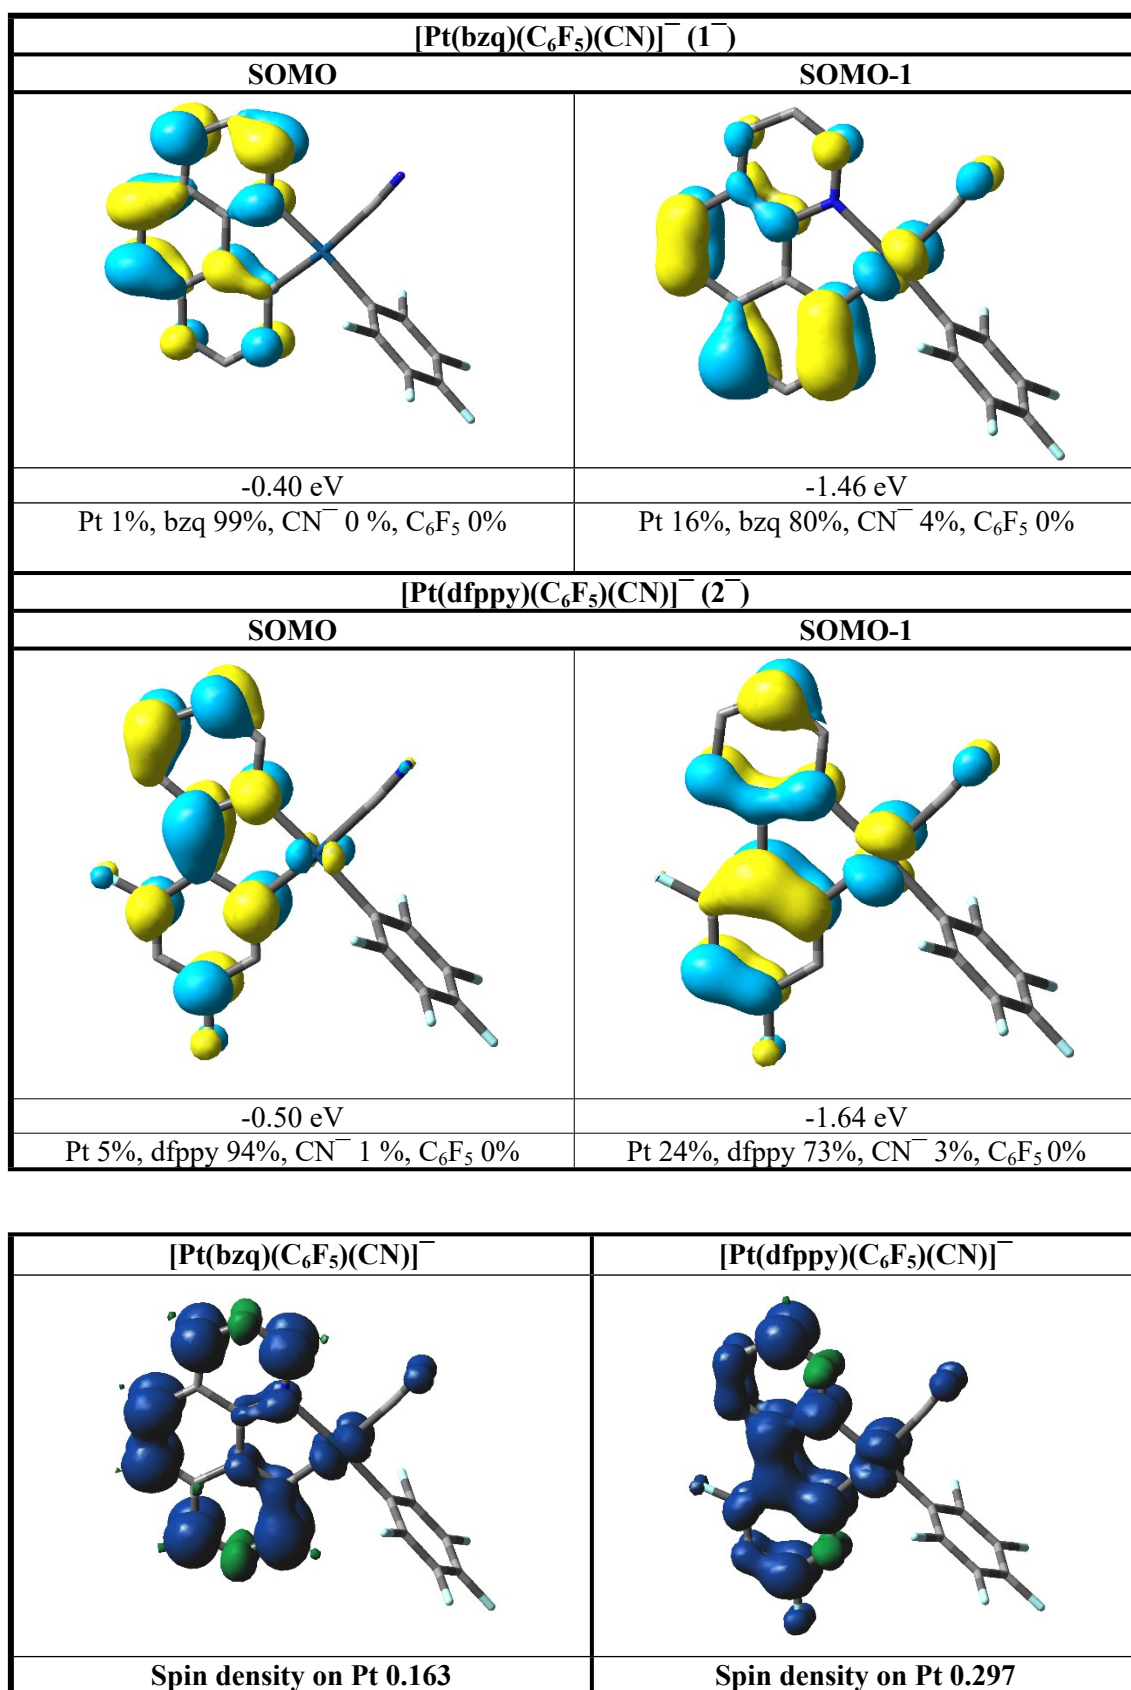

**Figure S16.** Plots and composition (%) of frontier MOs of the first triplet state in solid-state and spin distribution for the lowest triplet excited state for  $1^-$  and  $2^-$ .

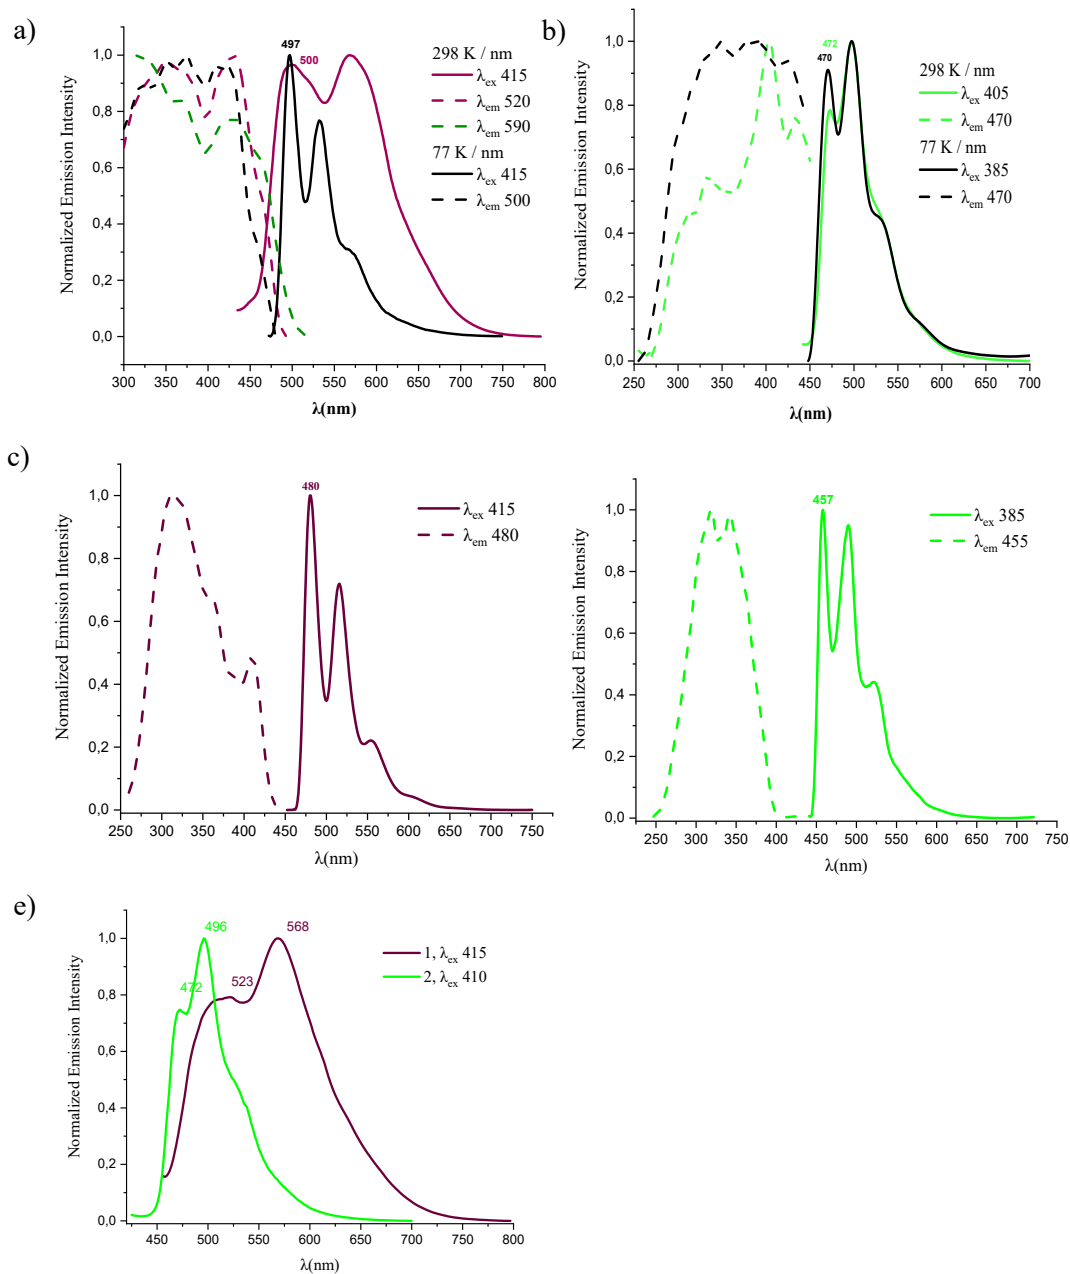

**Figure S17.** Normalized excitation and emission spectra of a) **1**, b) **2** in the solid state at 298 and 77 K; c) **1**, d) **2** in THF  $5 \times 10^{-5}$  M at 77 K; e) **1**, **2** in PS at 5% wt at 298 K.

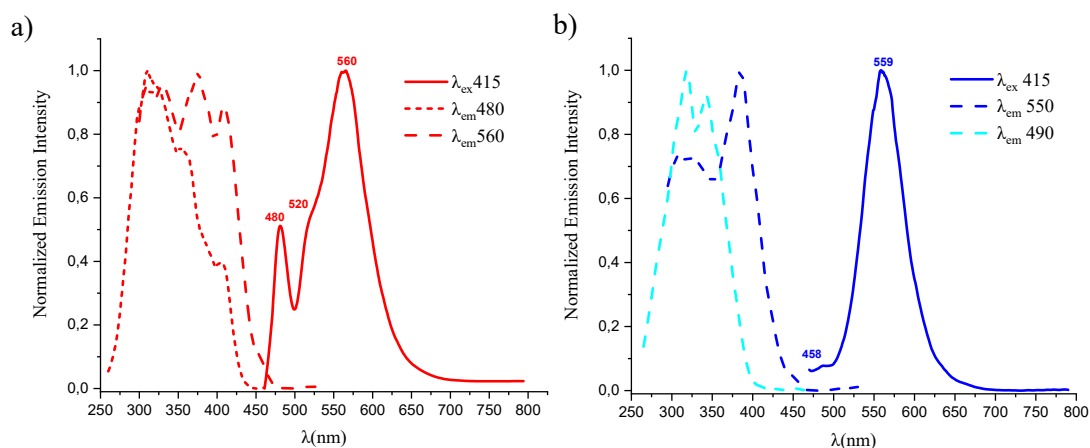

**Figure S18.** Normalized excitation (dashed line) and emission (solid line) spectra of a) **3**, b) **4** in THF  $5 \times 10^{-5}$  M at 77 K.

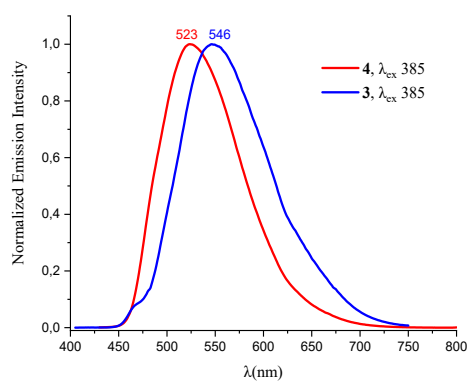

**Figure S19.** Normalized emission spectra of the compounds **3**, **4** in PS at 5% wt at 298K.

**Table S10.** Photoluminescence Properties of **3**, **4** in Solid State,  $\lambda_{em}(\lambda_{ex})/nm$

| T(K) | <b>3-<br/>Pristine</b> | <b>3-ground</b>                 | <b>3-MeOH</b> | <b>3-THF</b> | <b>3-Et<sub>2</sub>O</b> | <b>3-CH<sub>2</sub>Cl<sub>2</sub></b> | <b>4-<br/>Pristine</b> | <b>4-<br/>ground</b>         | <b>4-MeOH</b> |
|------|------------------------|---------------------------------|---------------|--------------|--------------------------|---------------------------------------|------------------------|------------------------------|---------------|
| 298  | 595(460)               | 606,<br>631 <sub>sh</sub> (460) | 583(415)      | 639(405)     | 606(415)                 | 558 <sub>sh</sub> ,<br>632(415)       | 546(460)               | 558,<br>610,<br>642<br>(500) | 590(460)      |
| 77   | 658(525)               | 662(525)                        | 650(530)      | 709(600)     | 624,691<br>(580)         | 720(615)                              | 563(450)               | 567,<br>670<br>(480)         | 662(520)      |

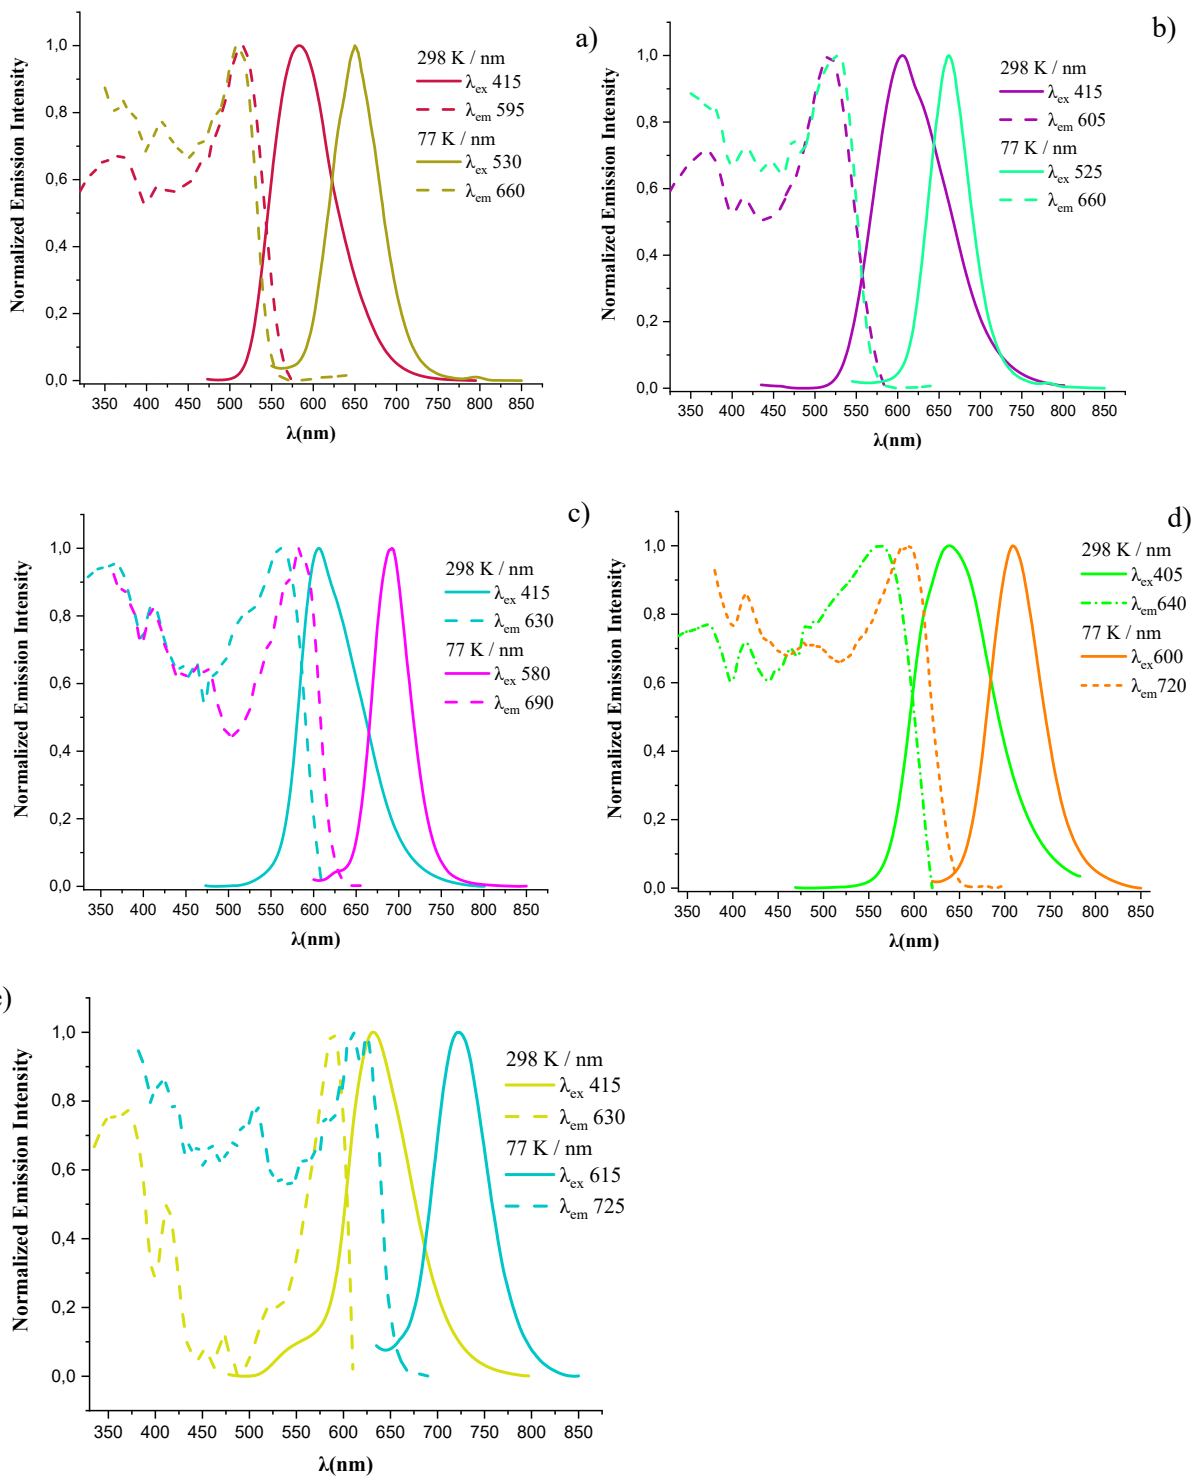

**Figure S20.** Normalized excitation (dashed line) and emission (solid line) spectra of complex a) **3-MeOH**, b) **3-Ground**, c) **3-Et<sub>2</sub>O**, d) **3-THF**, e) **3-CH<sub>2</sub>Cl<sub>2</sub>** in the solid state at 298 and 77 K.

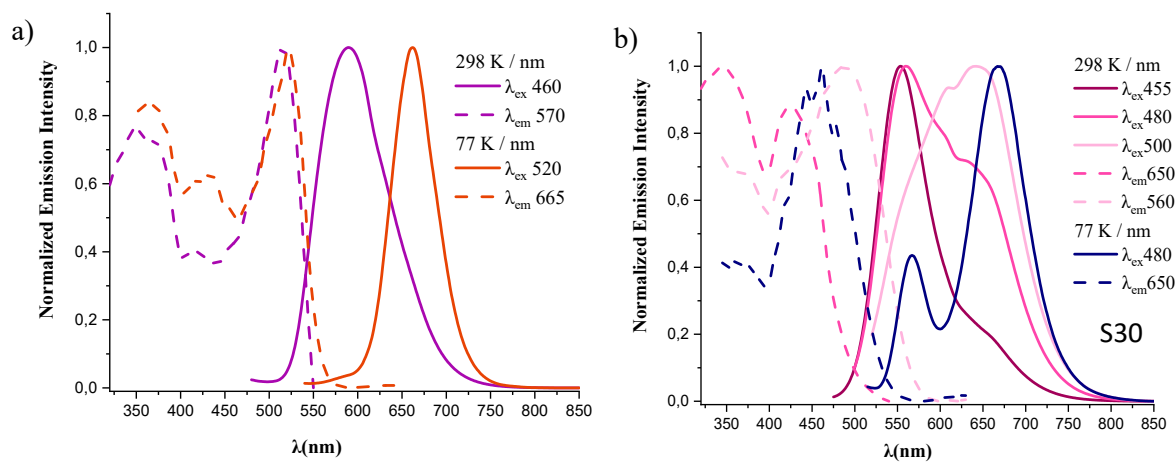

**Figure S21.** Normalized excitation (dashed line) and emission (solid line) spectra of complex a) **4-MeOH**, b) **4-Ground** in the solid state at 298 and 77 K.
